# Supplementary material for: Multiferroicity in 2D MSX2 (M = Nb and Zr; X = Cl, Br, and I)
Source: Royal Society of Chemistry journal article supplement (doi:10.1039/d4tc00463a), 2024-01-01
Supplement: d4tc00463a1.pdf [file d4tc00463a1.pdf]

## Supplemental Material for Multiferroicity in 2D $MSX_2$ ( $M = Nb$ and $Zr$ ; $X = Cl, Br,$ and $I$ )

Yutong Li<sup>1,2</sup>, Haoyun Bai<sup>2</sup>, Zhichao Yu<sup>2</sup>, Chi Tat Kwok<sup>1,2\*</sup>, and Hui Pan<sup>2,3\*</sup>

<sup>1</sup> Department of Electromechanical Engineering, Faculty of Science and Technology,  
University of Macau, Macao SAR, China

<sup>2</sup> Institute of Applied Physics and Materials Engineering, University of Macau, Macao SAR,  
China

<sup>3</sup> Department of Physics and Chemistry, Faculty of Science and Technology, University of  
Macao, Macao SAR, China

\*Corresponding authors:

C. T. Kwok: [fstctk@um.edu.mo](mailto:fstctk@um.edu.mo) (email)

H. Pan: [huipan@um.edu.mo](mailto:huipan@um.edu.mo) (email)

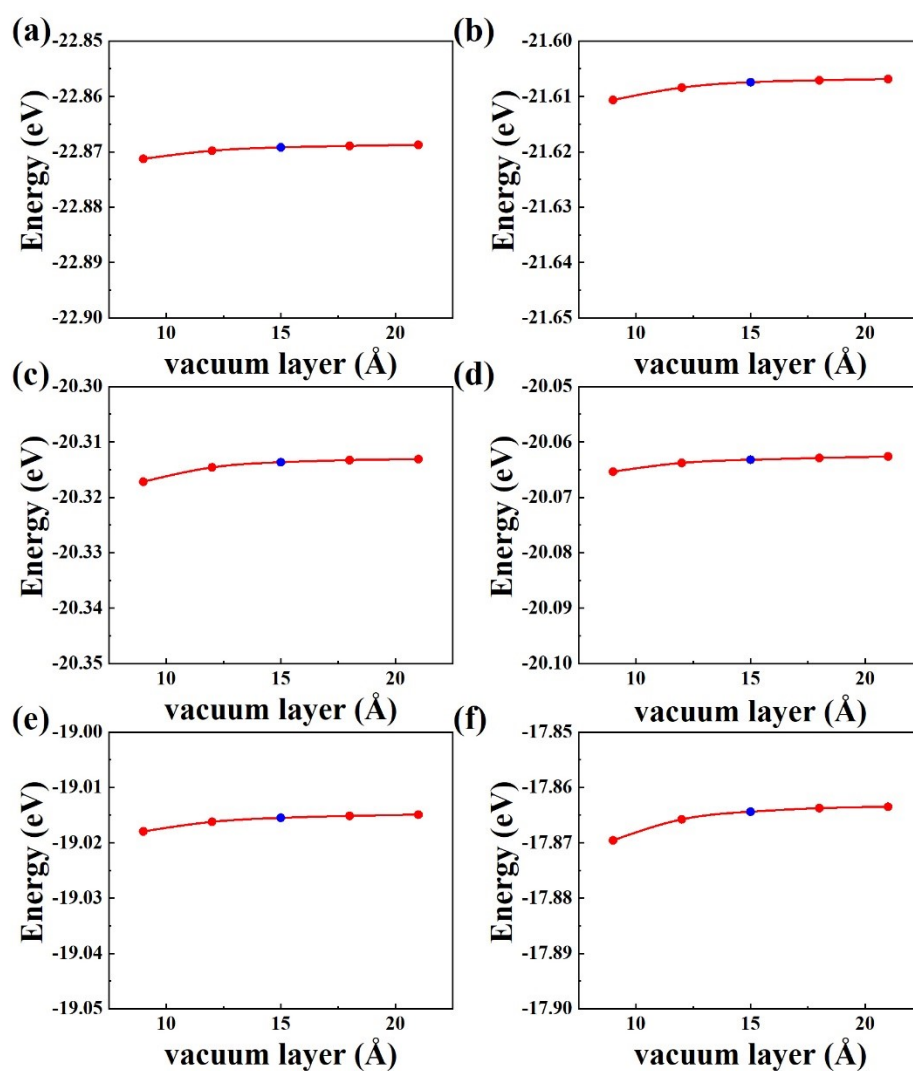

Figure S1 The total energy as a function of thickness of vacuum layer in (a) ZrSCl<sub>2</sub>, (b) ZrSBr<sub>2</sub>, (c) ZrSI<sub>2</sub>, (d) NbSCl<sub>2</sub>, (e) NbSBr<sub>2</sub>, (f) NbSI<sub>2</sub>. The vacuum layers used in our calculations is marked in blue blocks.

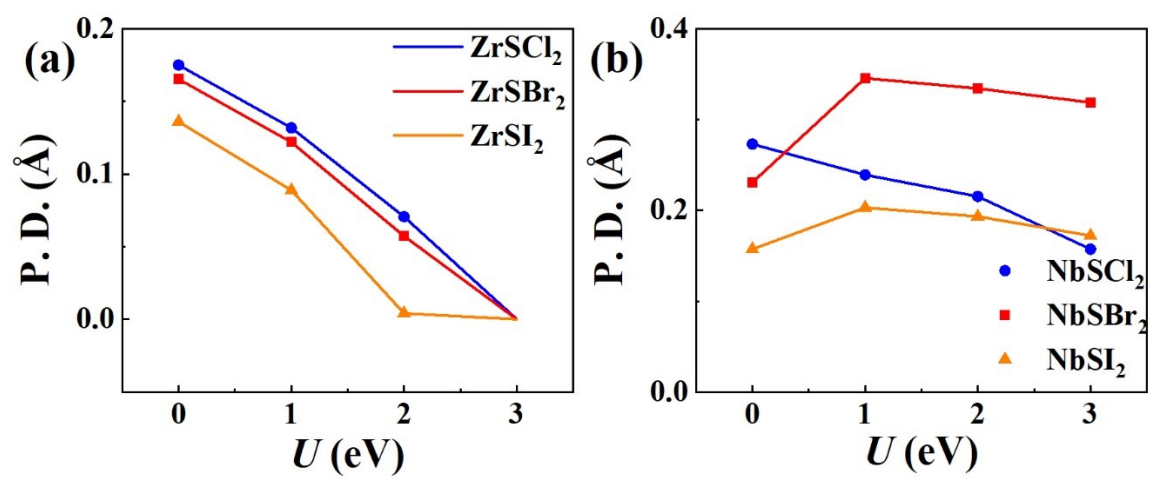

Figure S2 P. D. of (a) ZrSX<sub>2</sub> (b) NbSX<sub>2</sub> with different  $U$  values.

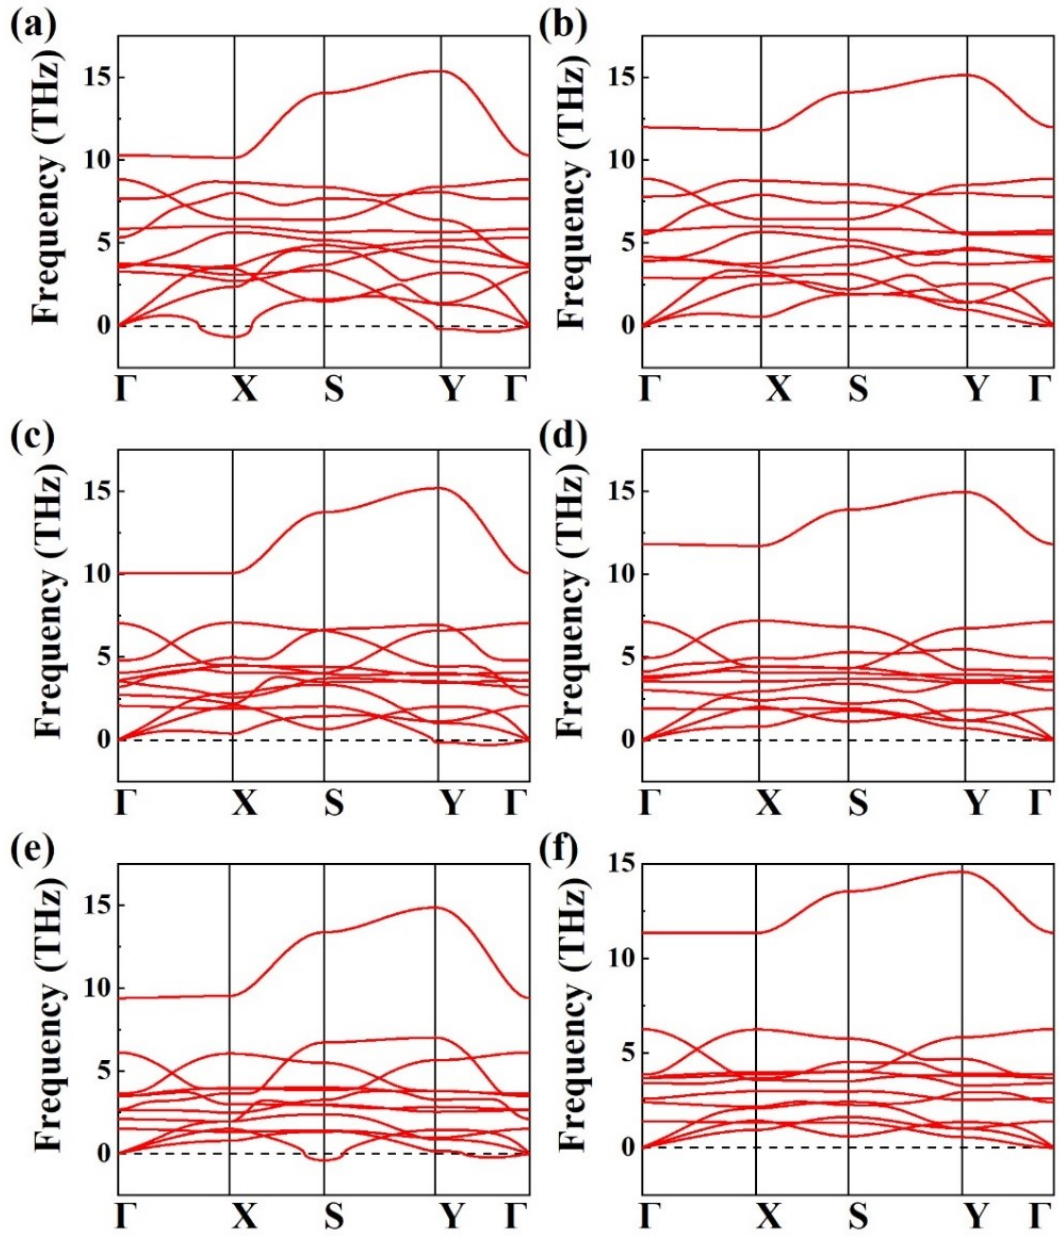

Figure S3 Phonon dispersions: FE  $\text{ZrSCl}_2$  (a) without and (b) with a tension of 5% along the  $b$ -axis; FE  $\text{ZrSBr}_2$  (c) without and (d) with a tension of 5% along the  $b$ -axis; FE  $\text{ZrSI}_2$  (e) without and (f) with a tension of 5% along the  $b$ -axis.

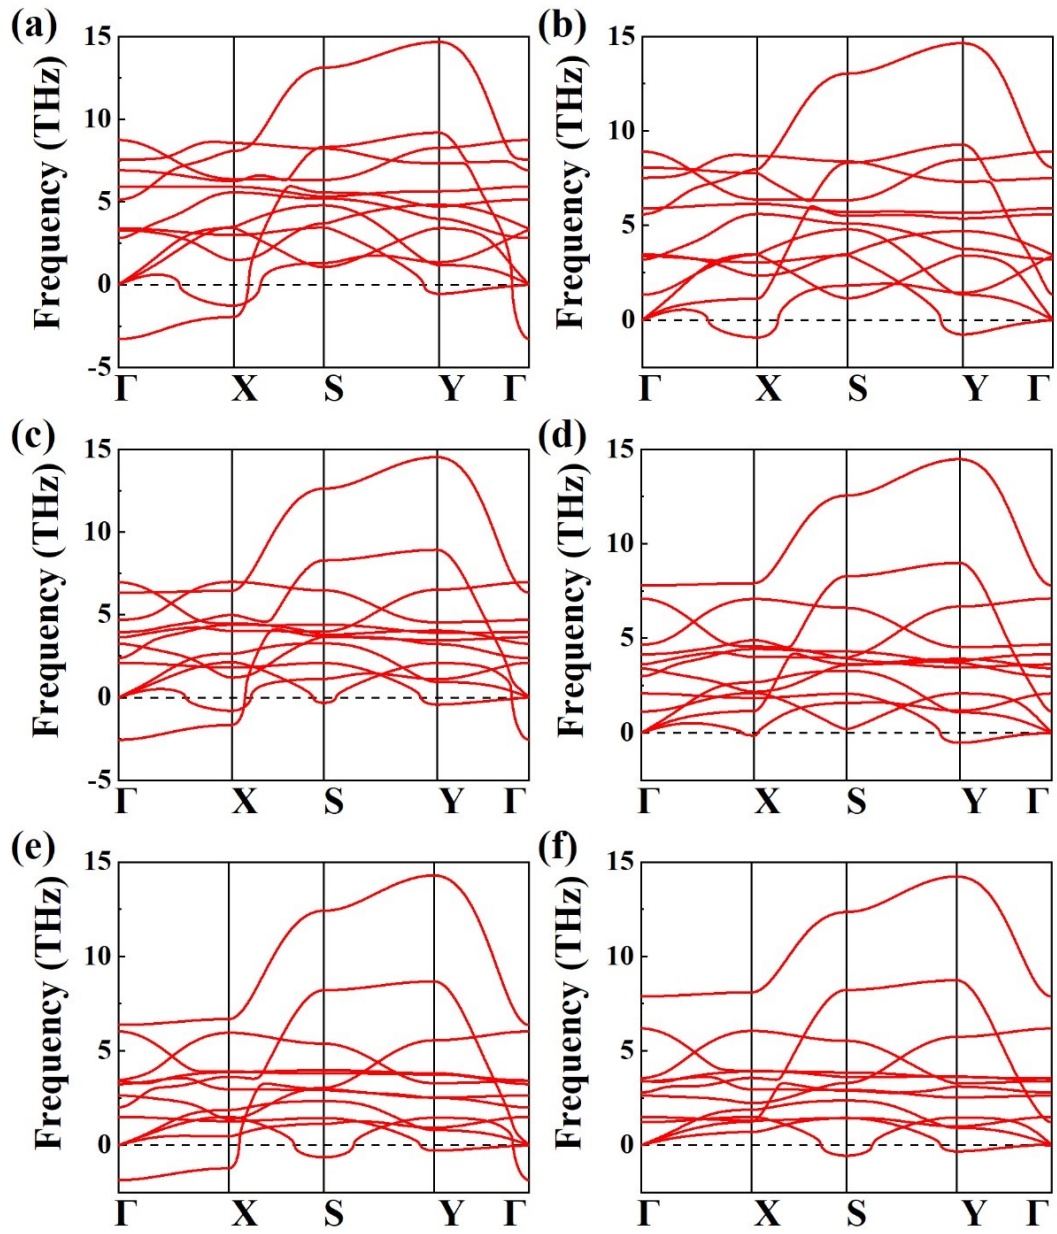

Figure S4 Phonon dispersions: PE ZrSCl<sub>2</sub> (a) without and (b) with  $U = 3$  eV; PE ZrSBr<sub>2</sub> (c) without and (d) with  $U = 3$  eV; PE ZrSI<sub>2</sub> (e) without and (f) with  $U = 3$  eV.



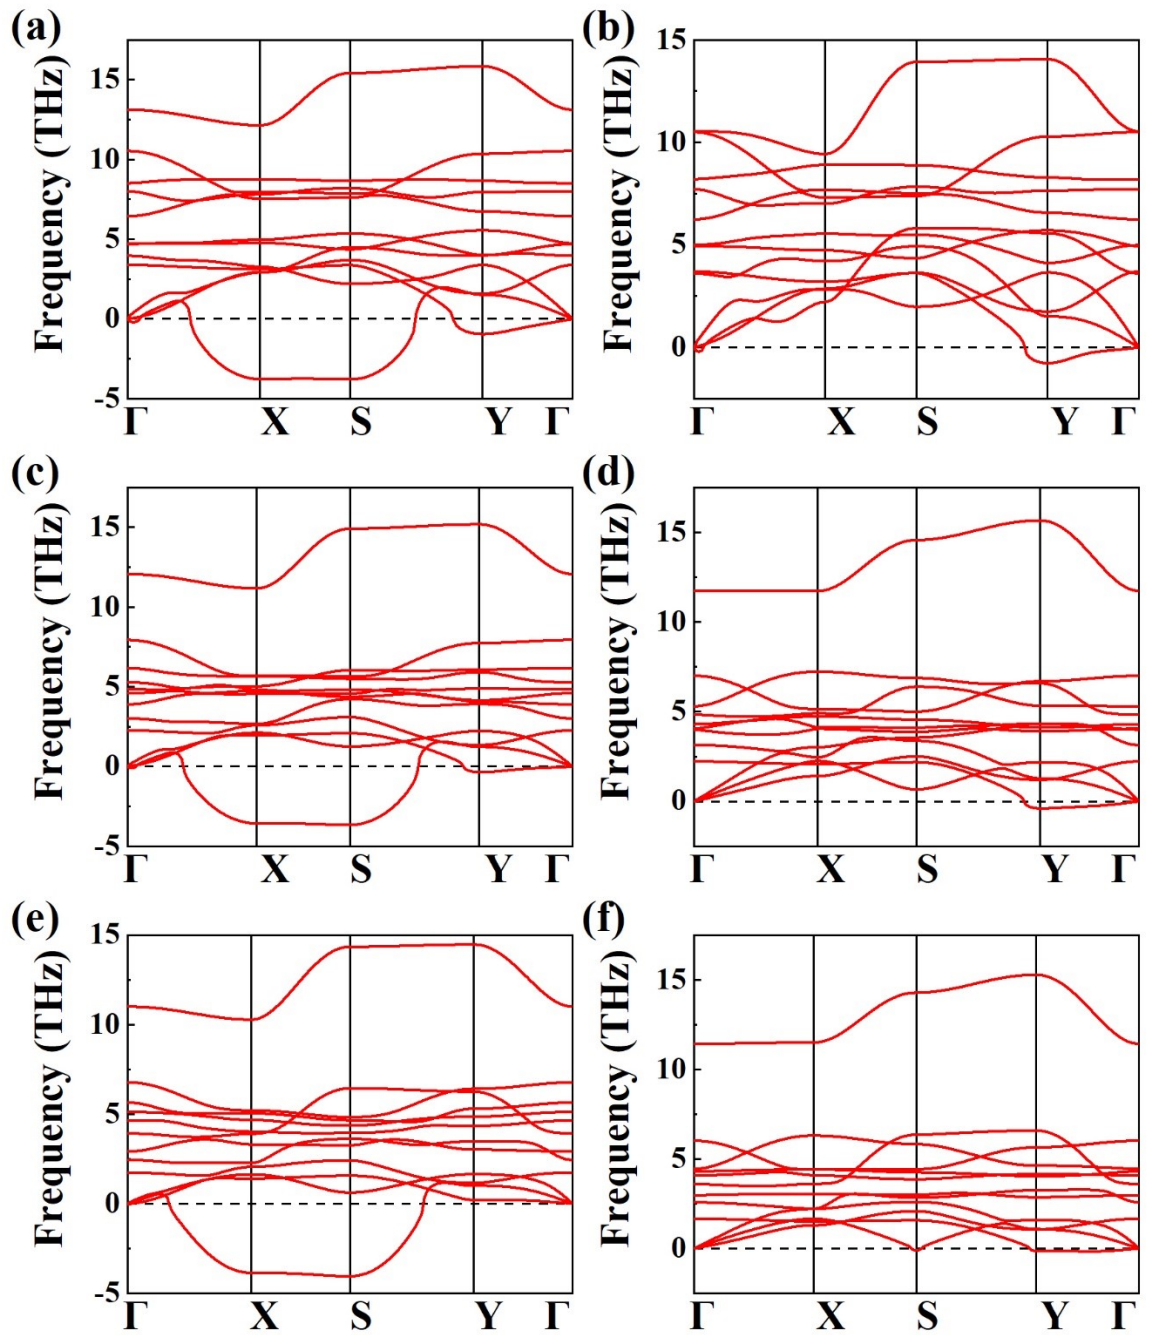

Figure S5 Phonon dispersions: FE NbSCl<sub>2</sub> (a) without and (b) with  $U = 3$  eV; FE NbSBr<sub>2</sub> (c) without and (d) with  $U = 3$  eV; FE NbSI<sub>2</sub> (e) without and (f) with  $U = 3$  eV.

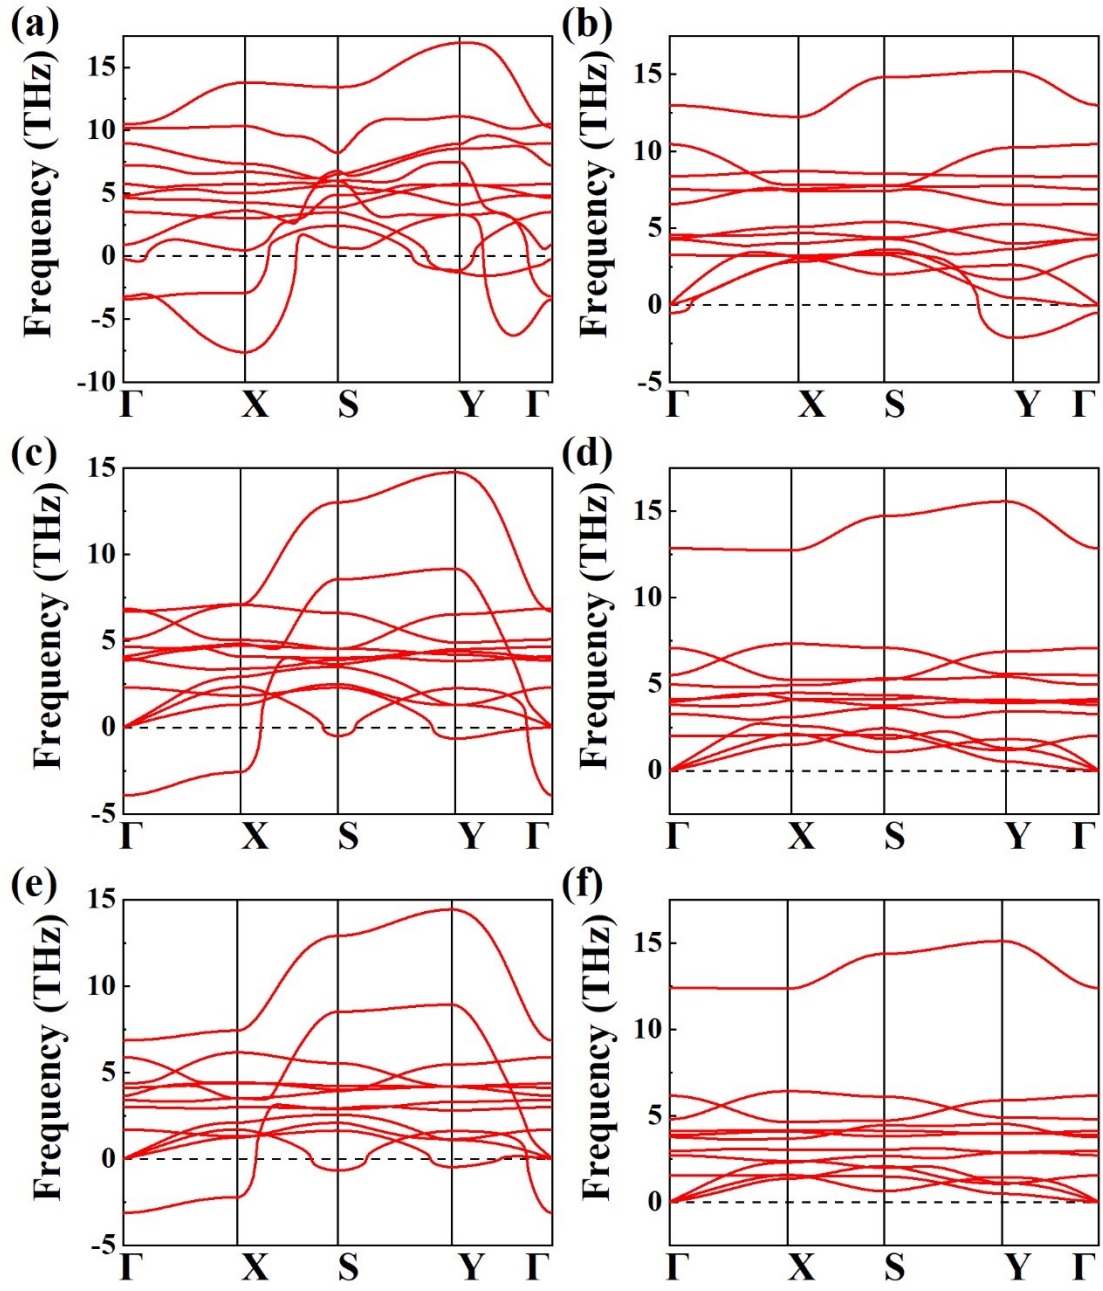

Figure S6 Phonon dispersions at  $U = 3$  eV under a tension of 5% along the  $b$ -axis: (a) PE and (b) FE NbSCl<sub>2</sub>; (c) PE and (d) FE NbSBr<sub>2</sub>; (e) PE and (f) FE NbSI<sub>2</sub>.

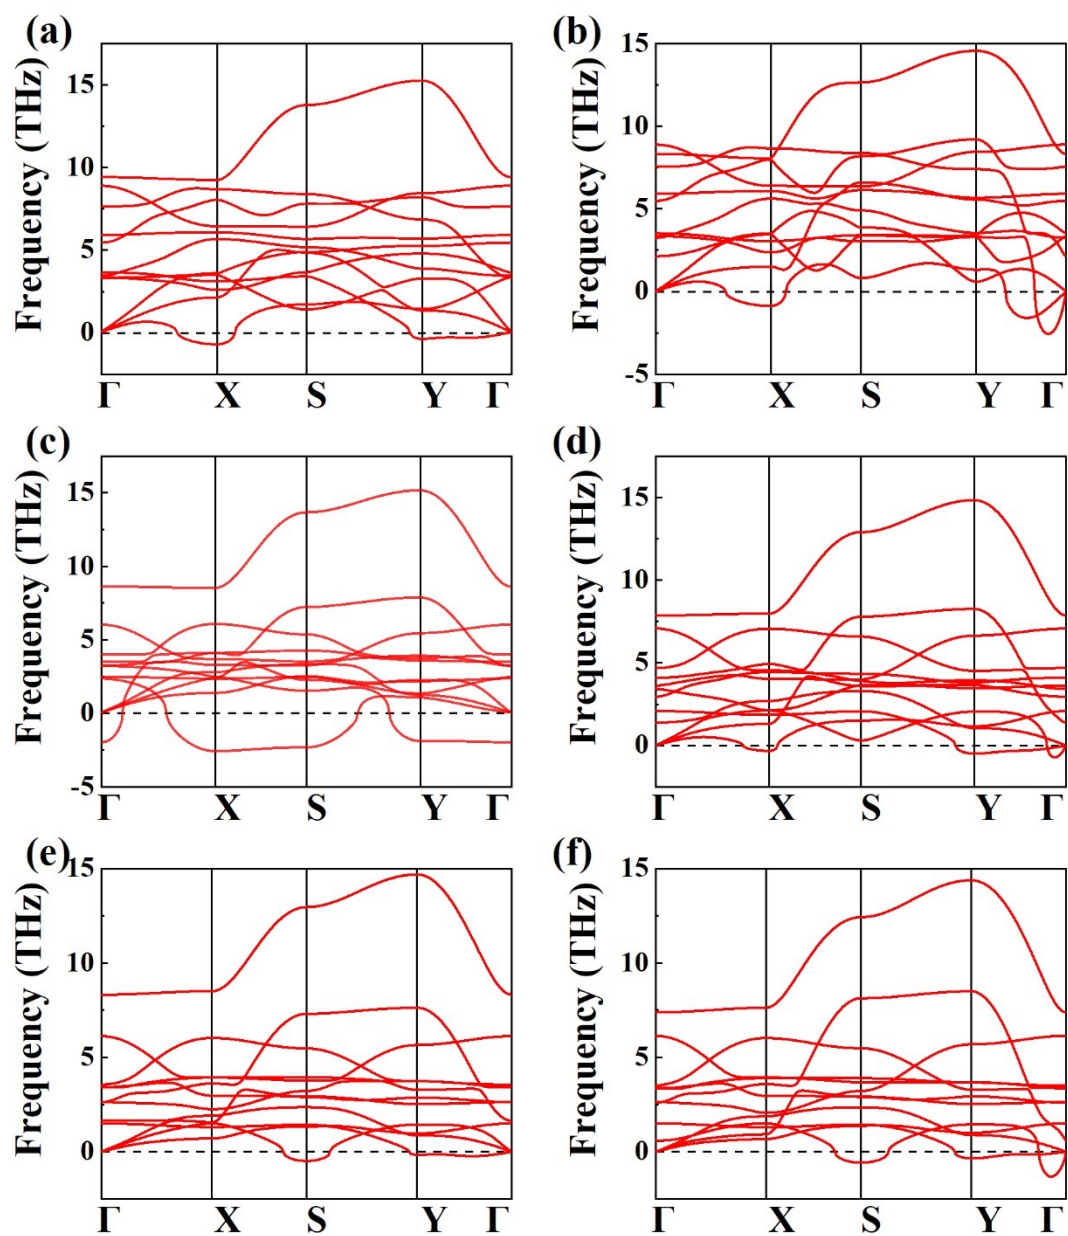

Figure S7 Phonon dispersions: FE ZrSCl<sub>2</sub> (a) with  $U = 1$  eV and (b)  $U = 2$  eV; FE ZrSBr<sub>2</sub> (c) with  $U = 1$  eV and (d)  $U = 2$  eV; FE ZrSI<sub>2</sub> (e) with  $U = 1$  eV and (f)  $U = 2$  eV.

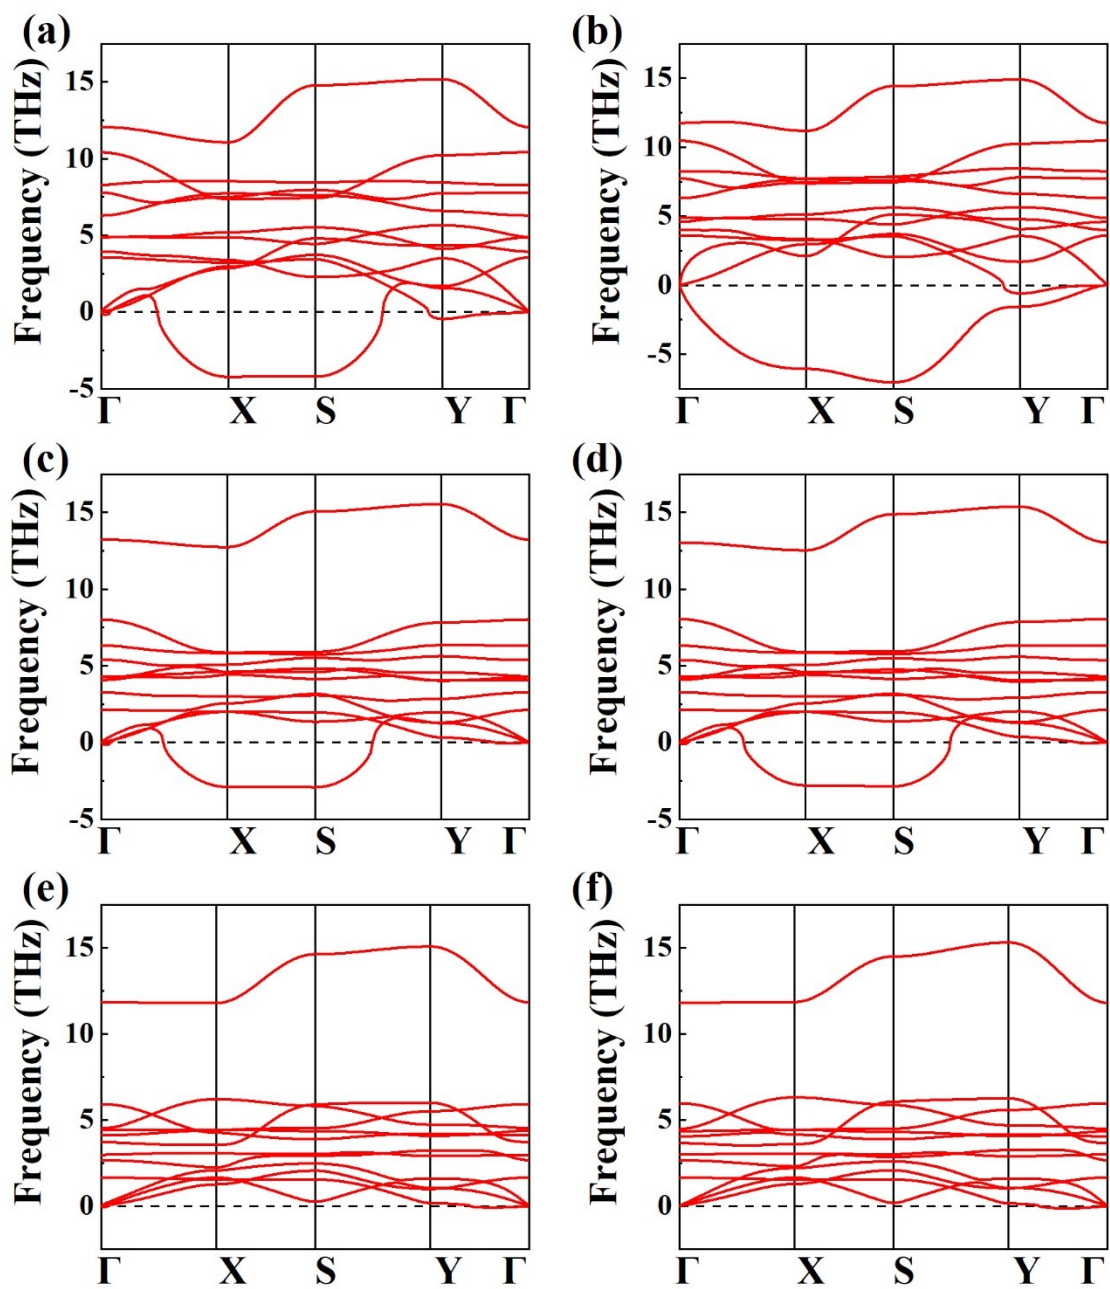

Figure S8 Phonon dispersions: FE NbSCl<sub>2</sub> (a) with  $U = 1$  eV and (b)  $U = 2$  eV; FE NbSBr<sub>2</sub> (c) with  $U = 1$  eV and (d)  $U = 2$  eV; FE NbSI<sub>2</sub> (e) with  $U = 1$  eV and (f)  $U = 2$  eV.



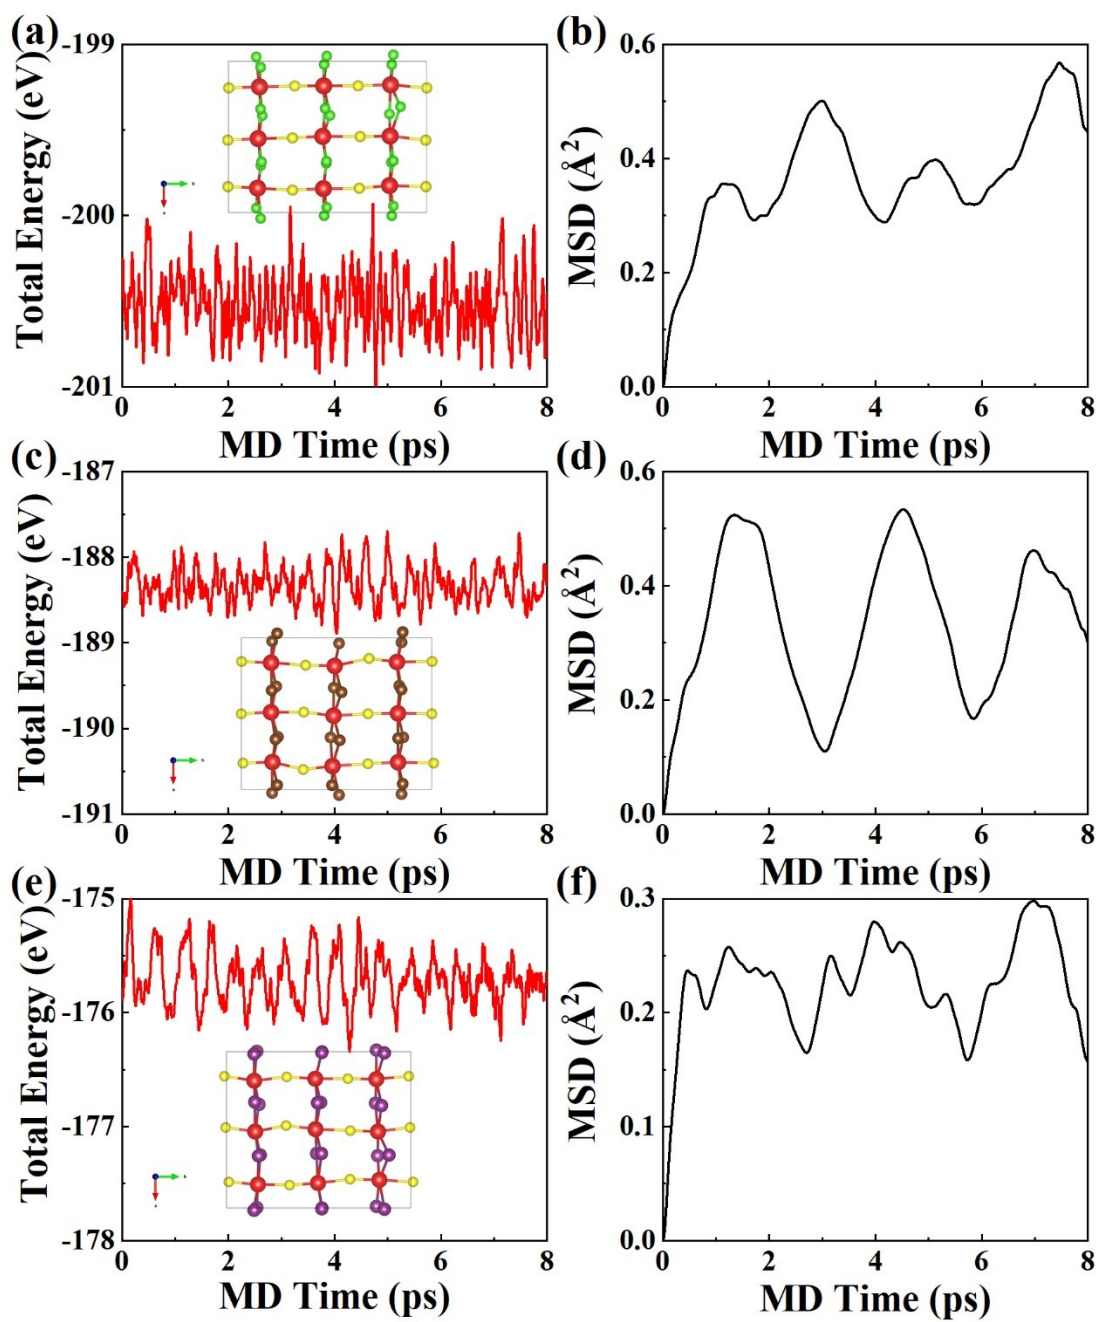

Figure S9 (a) The total energies and (b) the MSDs of ZrSCl<sub>2</sub>, (c) the total energies and (d) the MSDs of ZrSBr<sub>2</sub>, and (e) the total energies and (f) the MSDs of ZrSI<sub>2</sub> during the AIMD simulations.



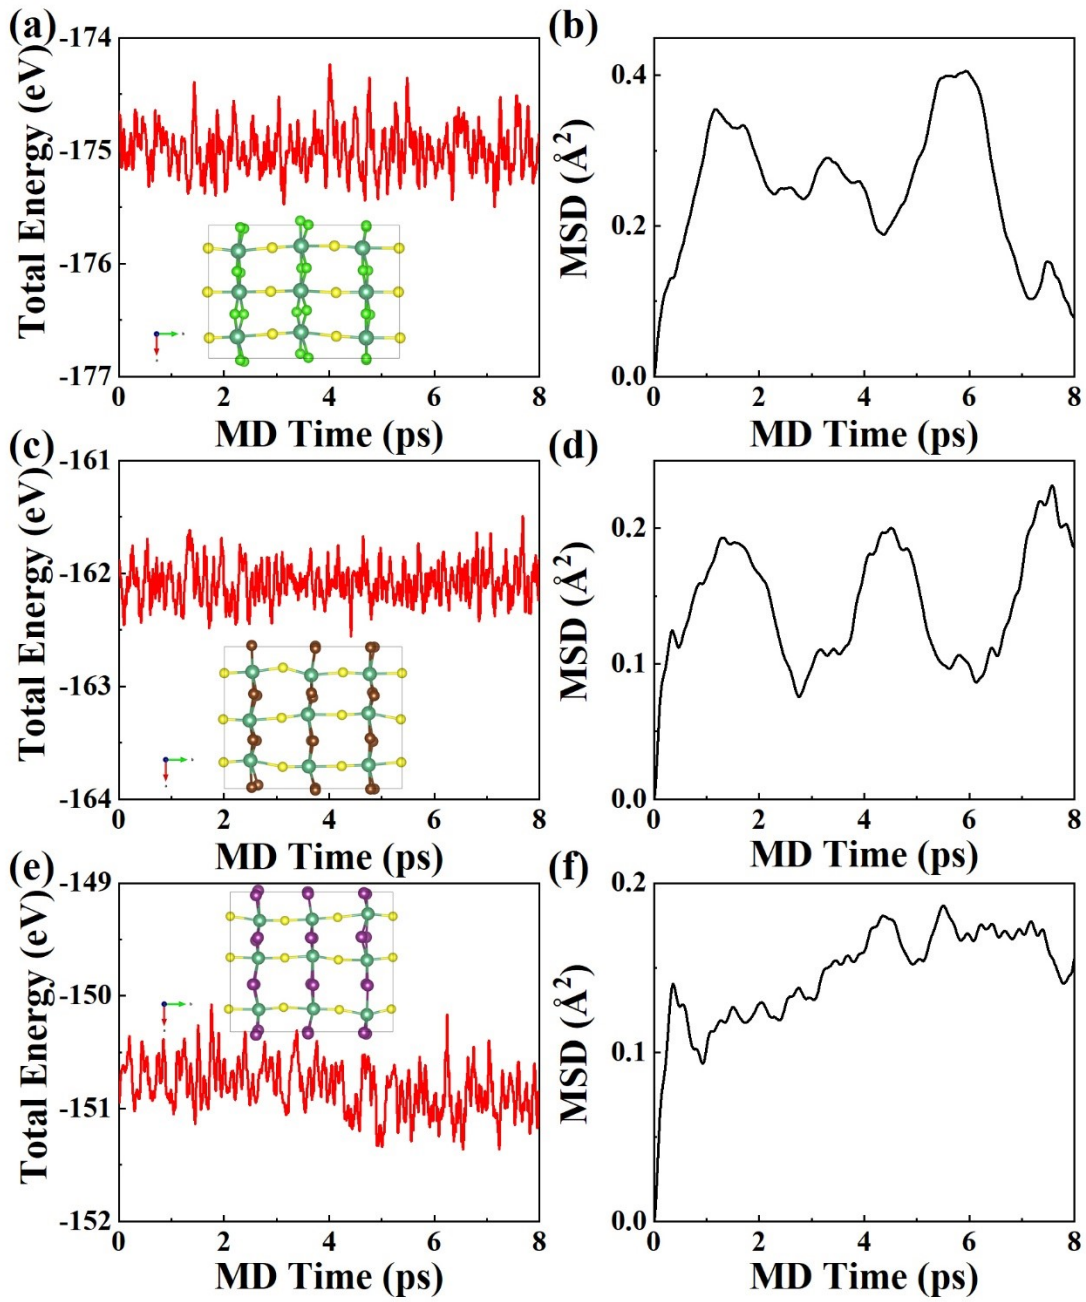

Figure S10 (a) The total energies and (b) the MSDs of NbSCl<sub>2</sub>, (c) the total energies and (d) the MSDs of NbSBr<sub>2</sub>, and (e) the total energies and (f) the MSDs of NbSI<sub>2</sub> with  $U = 3$  eV during the AIMD simulations.

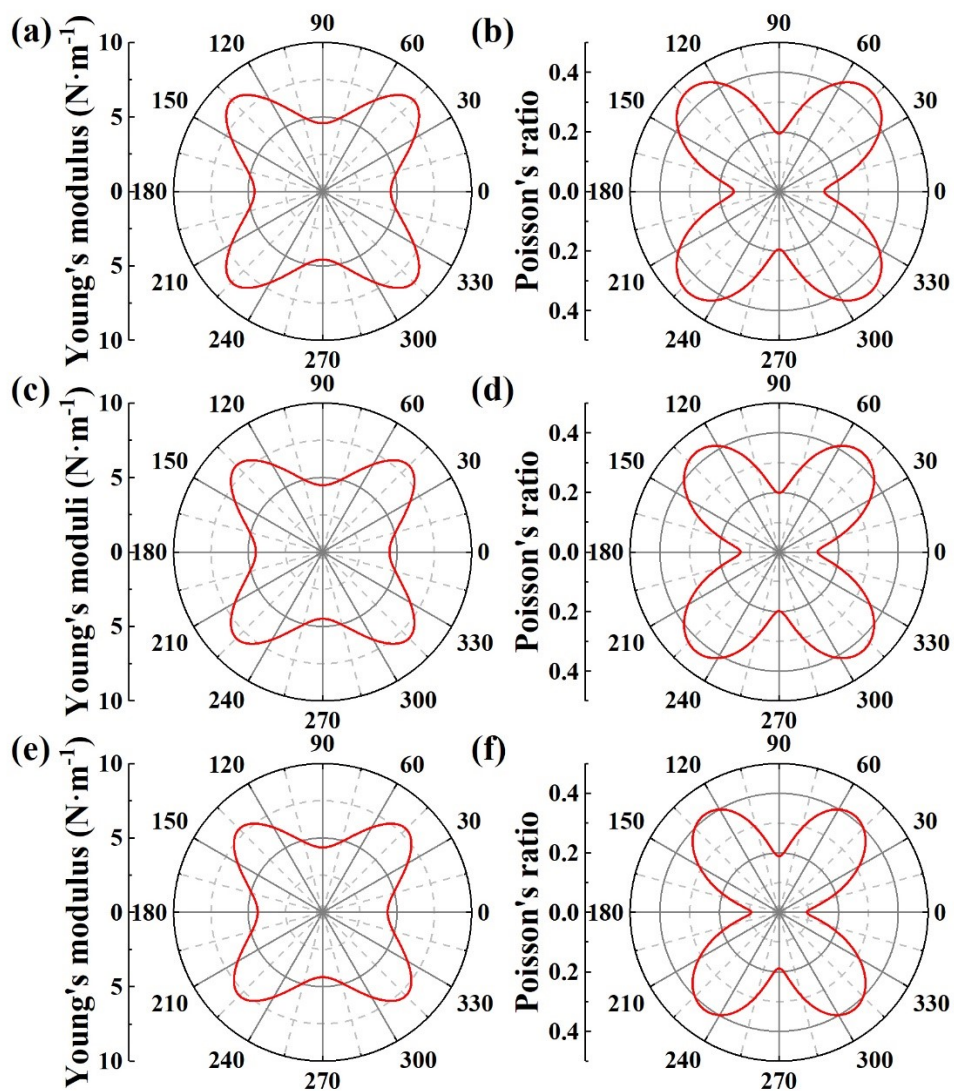

Figure S11 (a) Young's modulus and (b) Poisson's ratio of  $\text{ZrSCl}_2$ , (c) Young's modulus and (d) Poisson's ratio of  $\text{ZrSBr}_2$ , and (e) Young's modulus and (f) Poisson's ratio of  $\text{ZrSI}_2$ .

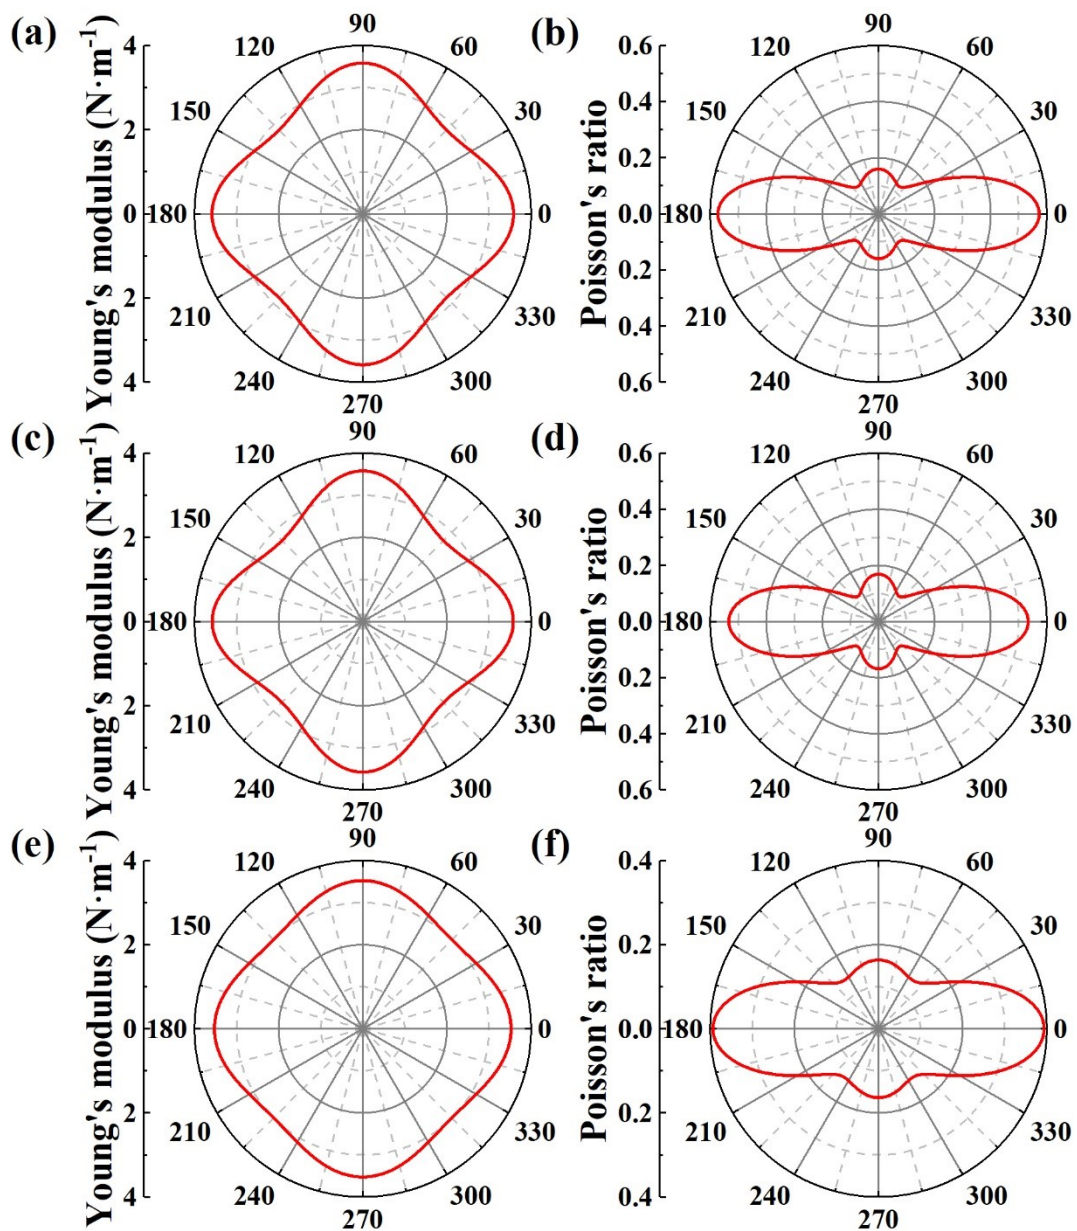

Figure S12 (a) Young's modulus and (b) Poisson's ratio of  $\text{ZrSCl}_2$ , (c) Young's modulus and (d) Poisson's ratio of  $\text{ZrSBr}_2$ , and (e) Young's modulus and (f) Poisson's ratio of  $\text{ZrSI}_2$  under a tension of 5% along the  $b$ -axes.



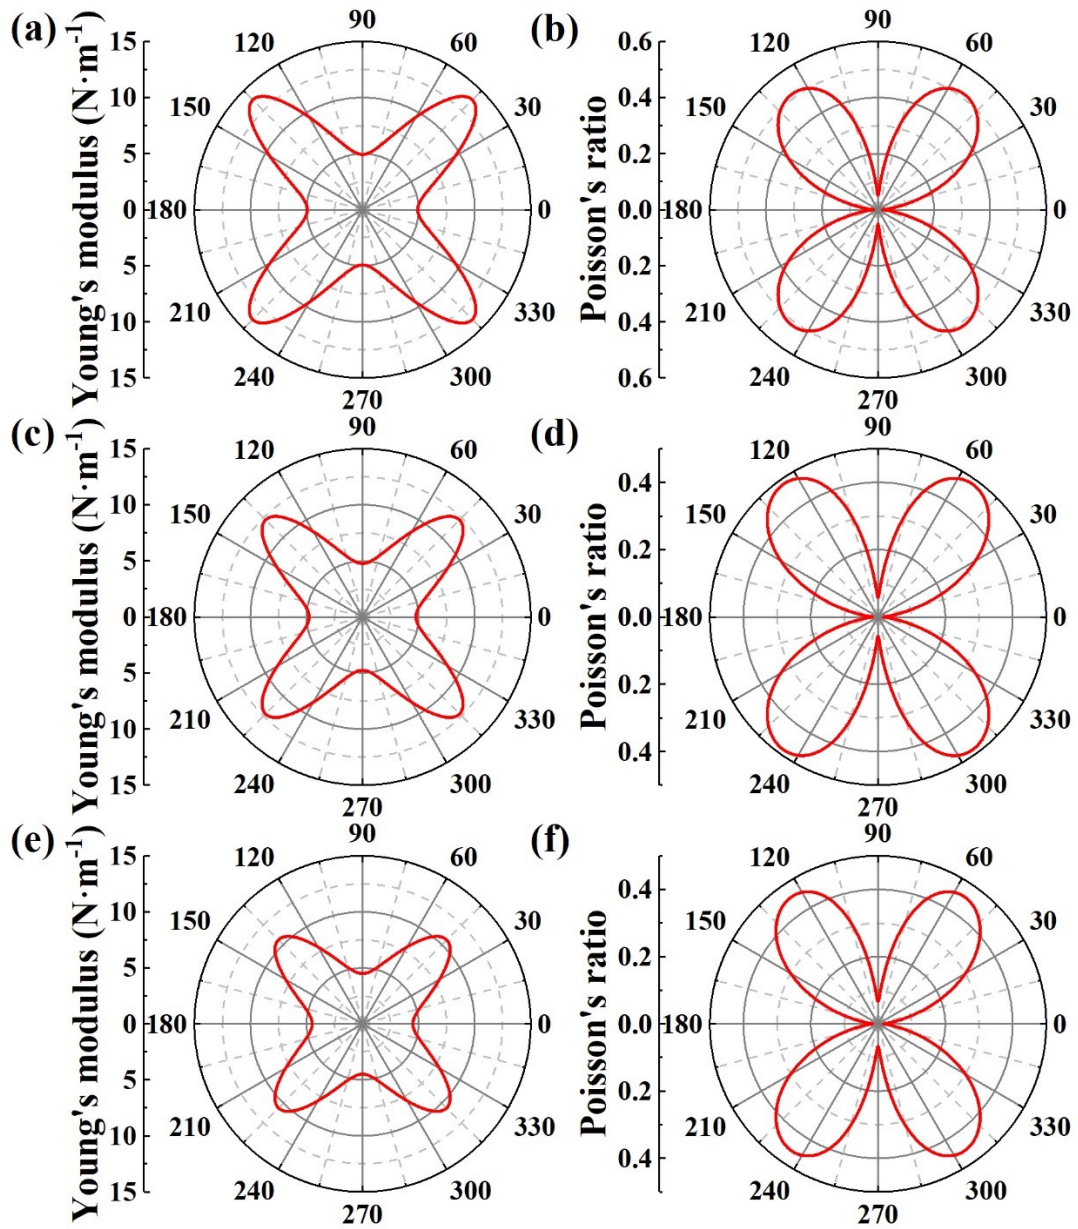

Figure S13 (a) Young's modulus and (b) Poisson's ratio of  $\text{ZrSCl}_2$ , (c) Young's modulus and (d) Poisson's ratio of  $\text{ZrSBr}_2$ , and (e) Young's modulus and (f) Poisson's ratio of  $\text{ZrSI}_2$  with  $U = 3$  eV.

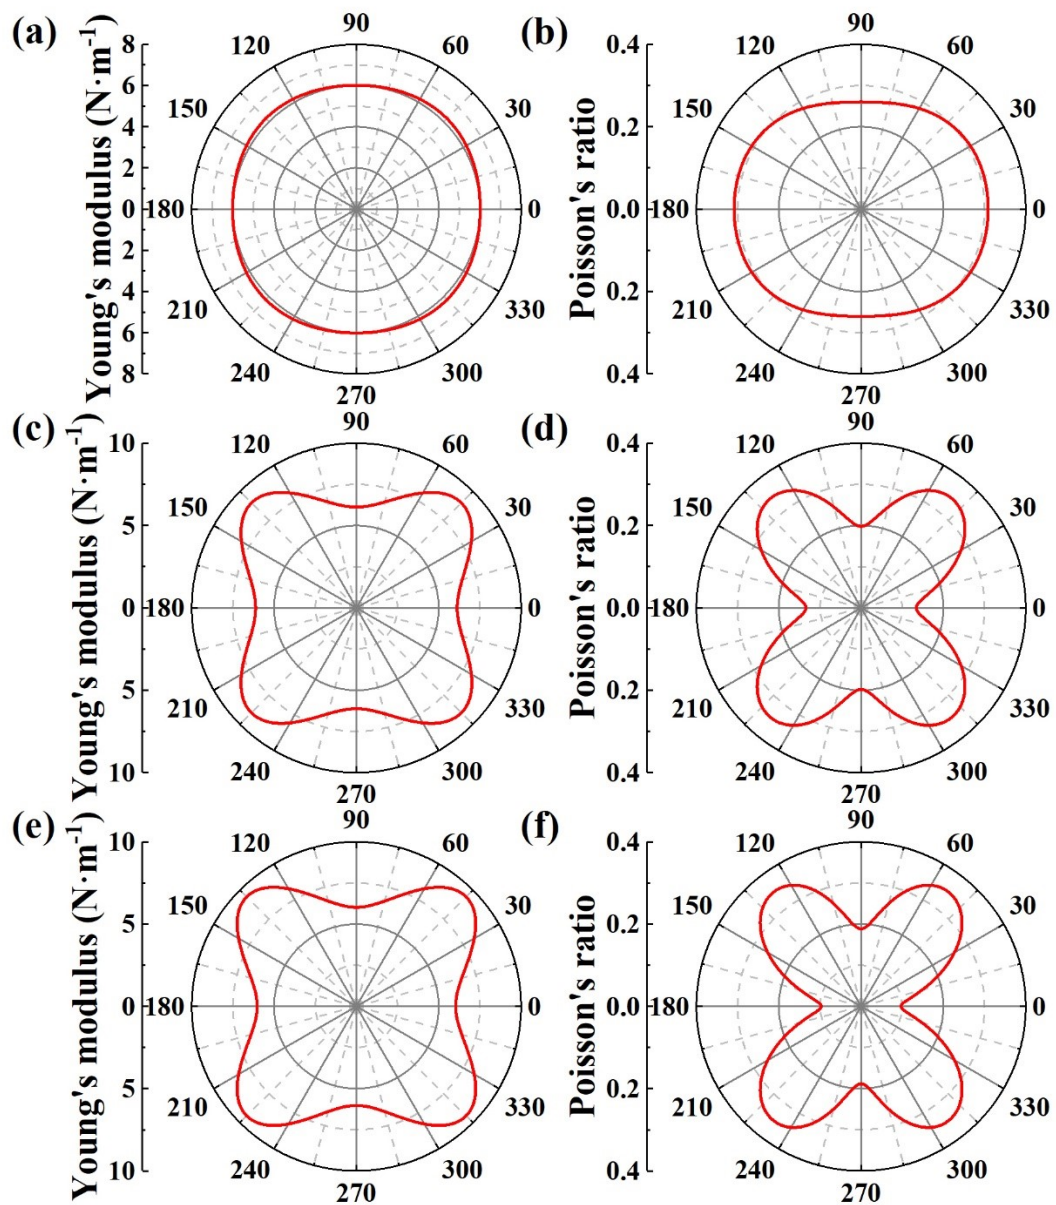

Figure S14 (a) Young's modulus and (b) Poisson's ratio of NbSCl<sub>2</sub>, (c) Young's modulus and (d) Poisson's ratio of NbSBr<sub>2</sub>, and (e) Young's modulus and (f) Poisson's ratio of NbSI<sub>2</sub> with  $U = 3$  eV.



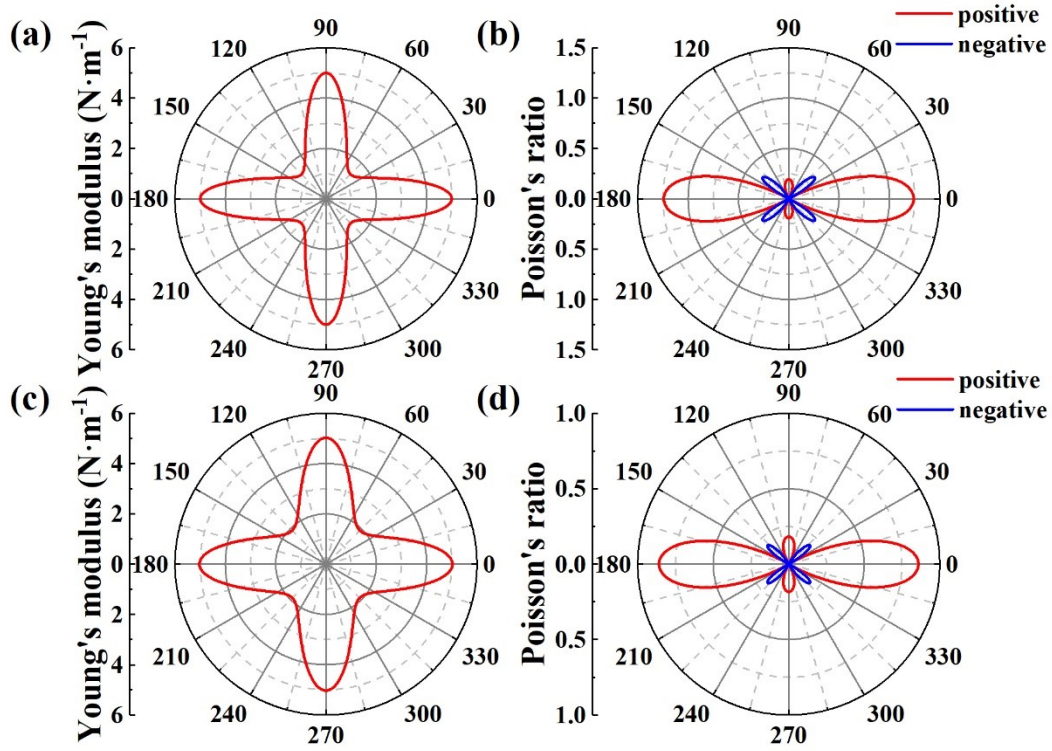

Figure S15 (a) Young's modulus and (b) Poisson's ratio of NbSBr<sub>2</sub>, and (c) Young's modulus and (d) Poisson's ratio of NbSI<sub>2</sub> with  $U = 3$  eV and a tension of 5% along the  $b$ -axis.

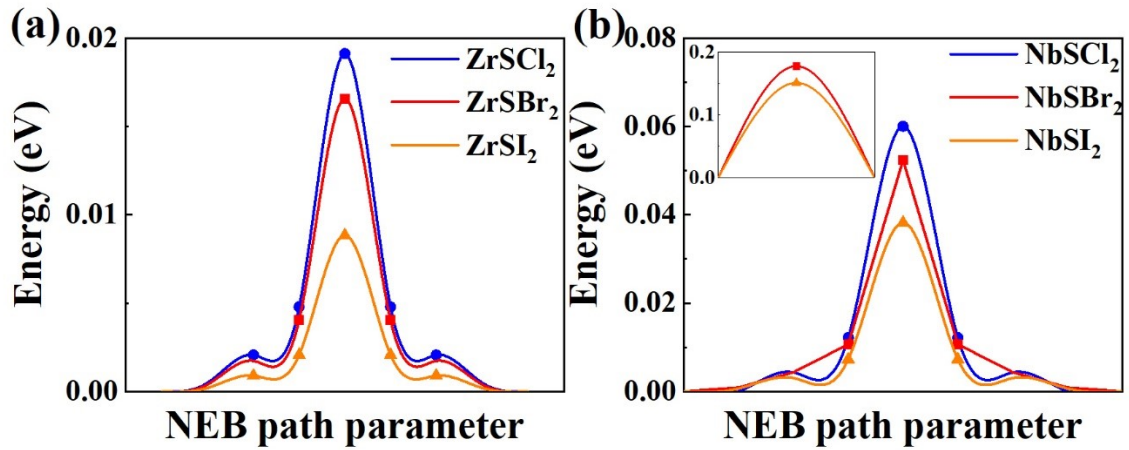

Figure S16 The energies relative to FE states as a function of step number within NEB for FE and AFE states during the ferroelastic switching in (a) ZrSX<sub>2</sub> and (b) NbSX<sub>2</sub>. The inset is the energy barriers of ferroelastic switching in NbSBr<sub>2</sub> and NbSI<sub>2</sub> under a tension of 5 % along the  $b$ -axes.

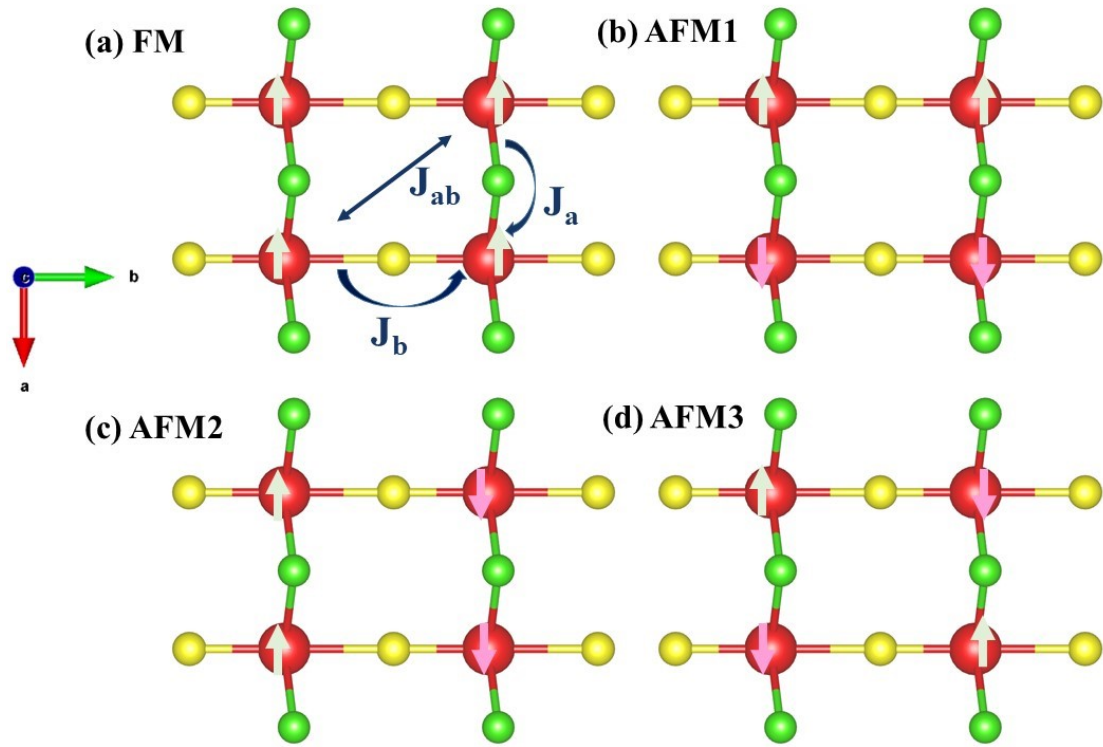

Figure S17 Top views of AFM states in a  $2 \times 2 \times 1$  supercell. Red, yellow, and green spheres denote M, S, and X atoms, respectively. White and pink arrows represent the spin-up and spin-down moments, respectively.

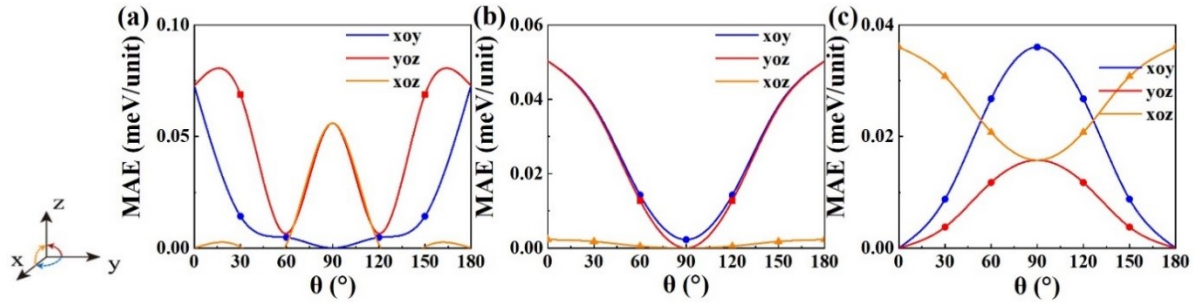

Figure S18 MAEs of (a) NbSCl<sub>2</sub>, (b) NbSBr<sub>2</sub> and (c) NbSI<sub>2</sub>.

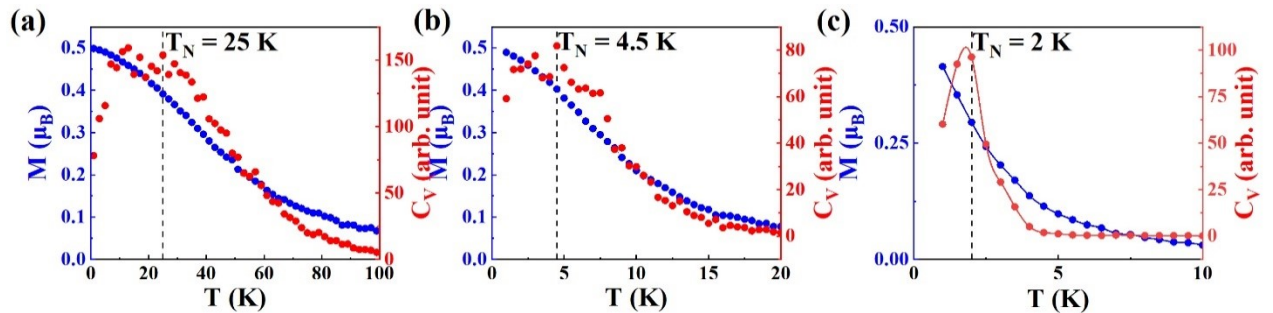

Figure S19 The simulated average magnetic moment ( $M$ ) and specific heat ( $C_V$ ) as the functions of temperature: (a) NbSCl<sub>2</sub>, (b) NbSBr<sub>2</sub>, and (c) NbSI<sub>2</sub>.

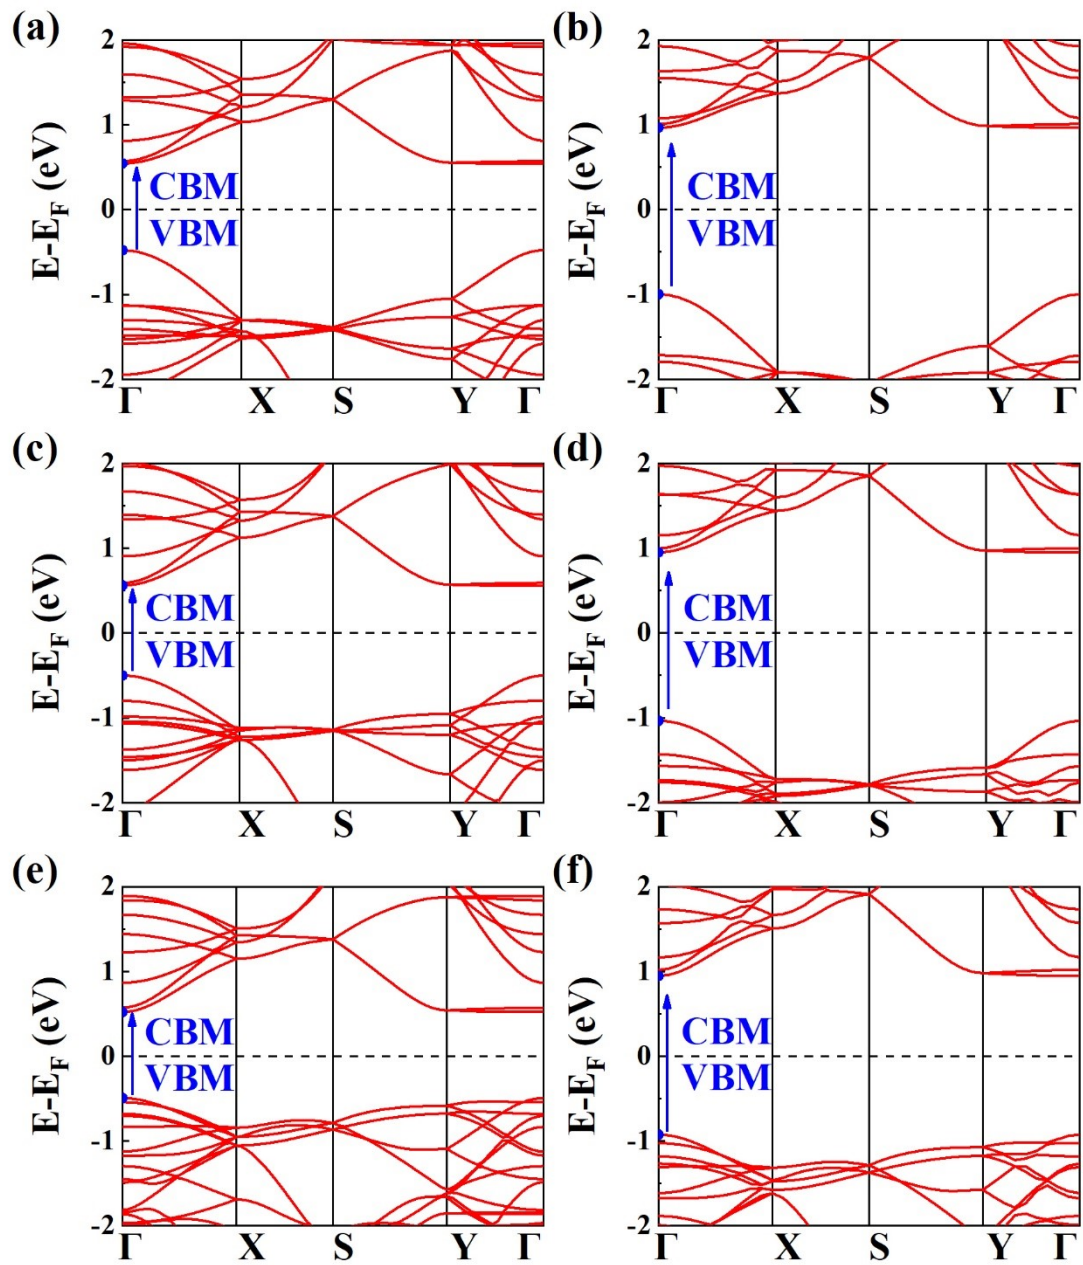

Figure S20 Band structures: FE ZrSCl<sub>2</sub> by (a) DFT and (b) HSE06, FE ZrSBr<sub>2</sub> by (c) DFT and (d) HSE06, and FE ZrSI<sub>2</sub> by (e) DFT and (f) HSE06.

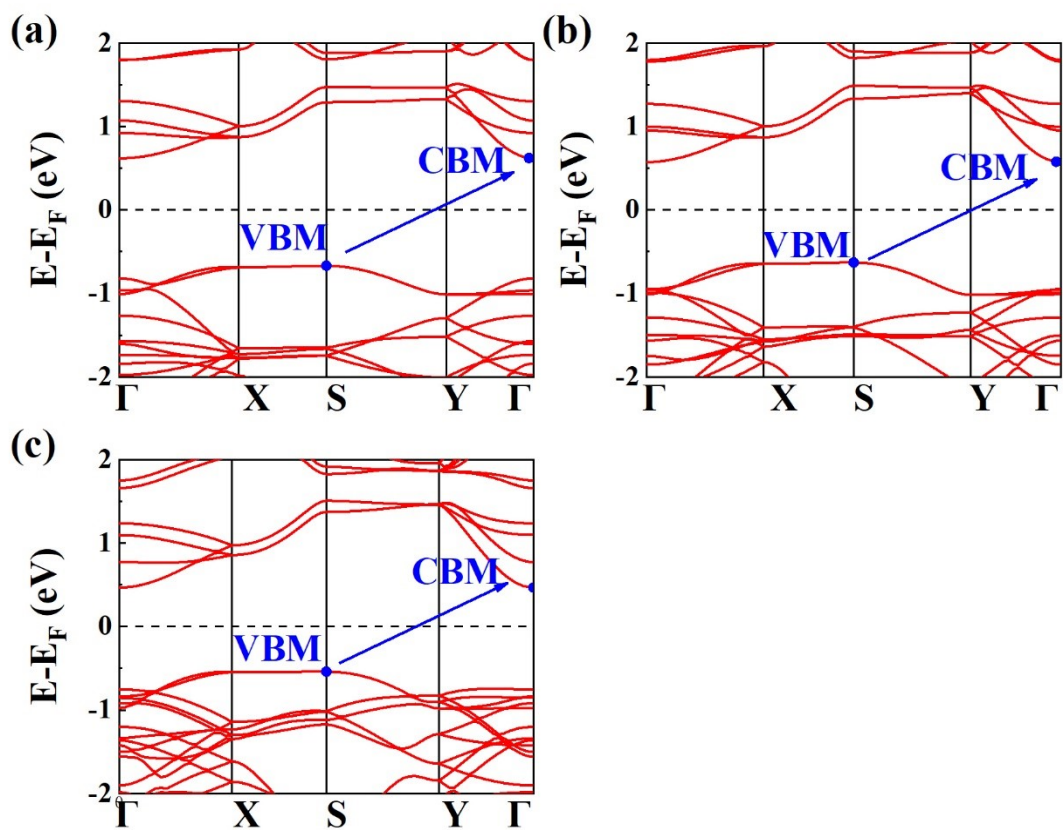

Figure S21 Band structures of (a) FE NbSCl<sub>2</sub>, (b) FE NbSBr<sub>2</sub>, and (c) FE NbSI<sub>2</sub> by DFT+*U* (*U* = 3 eV).

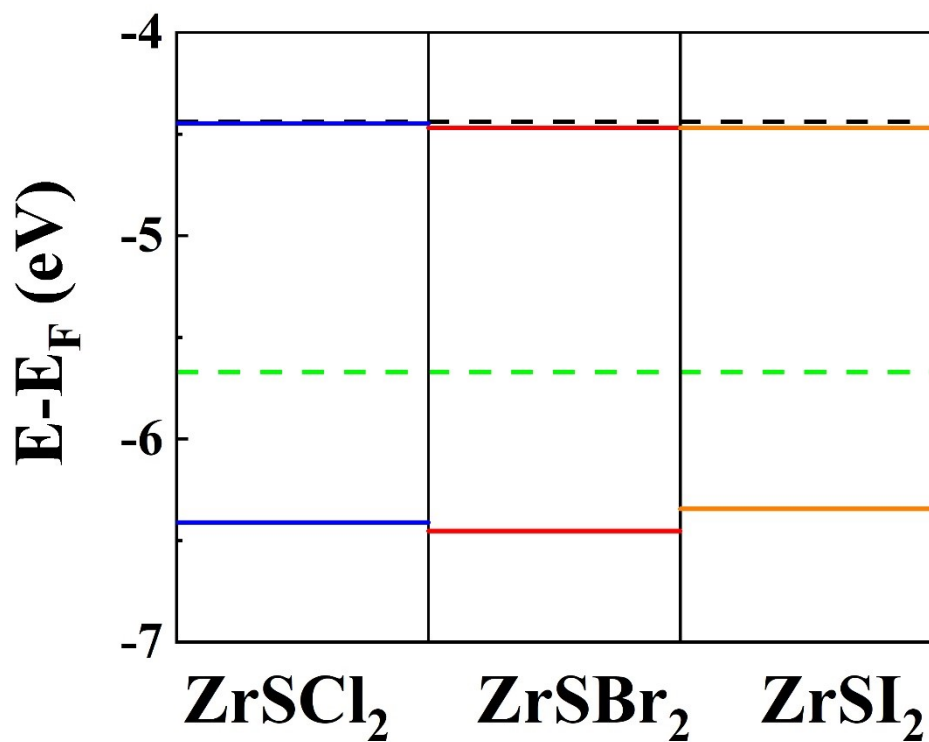

Figure S22 Band edge positions with HSE06 relative to the water redox potentials (pH = 0). positions of the reduction (H<sup>+</sup>/H<sub>2</sub>) and oxidation (O<sub>2</sub>/H<sub>2</sub>O) potentials of water are denoted by black and green dash lines, respectively.



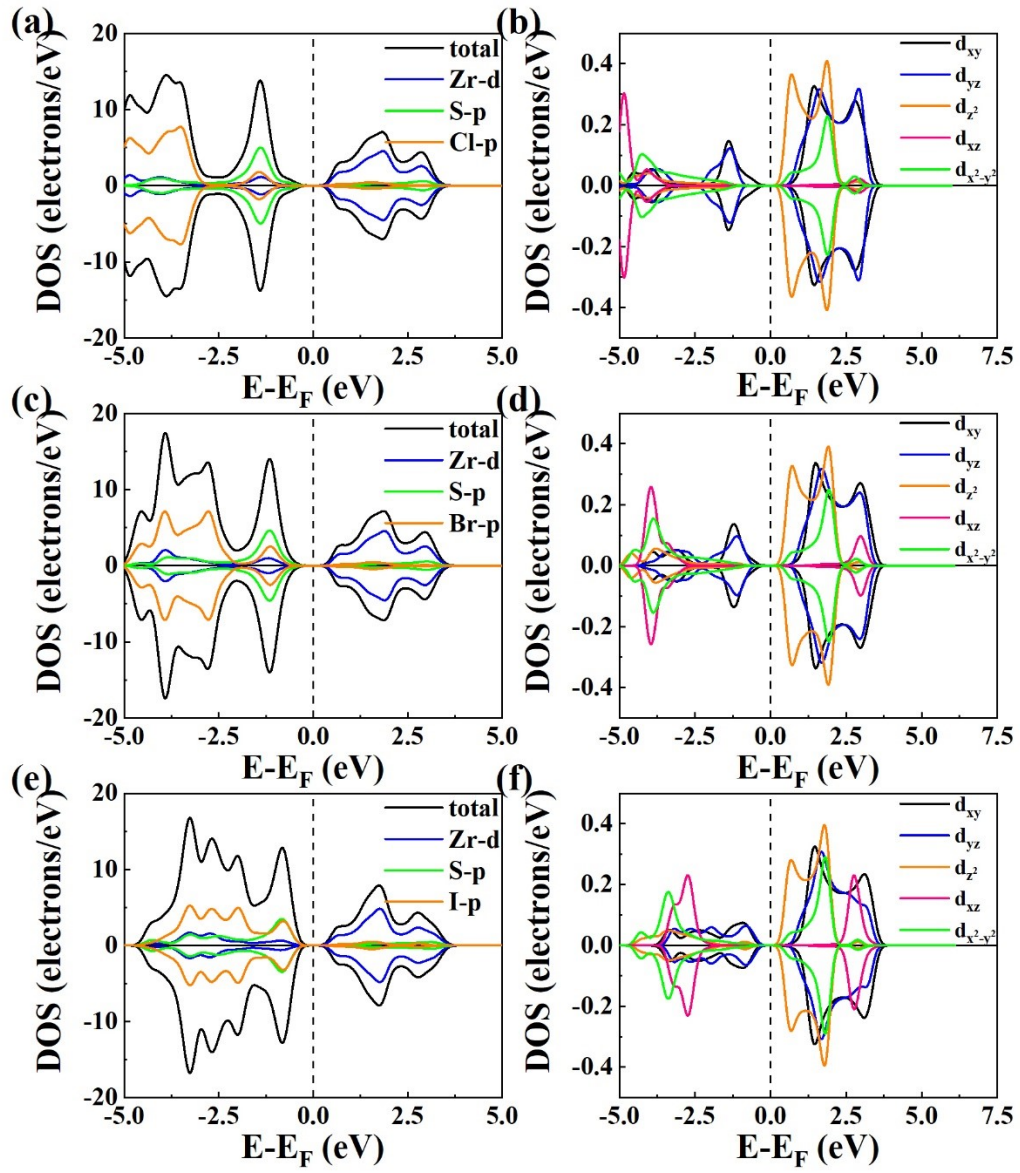

Figure S23 (a) PDOSs of ions and (b) PDOSs of the  $d$  electrons of Zr atoms for FE ZrSCl<sub>2</sub>, (c) PDOSs of ions and (d) PDOSs of the  $d$  electrons of Zr atoms for FE ZrSBr<sub>2</sub>, and (e) PDOSs of ions and (f) PDOSs of the  $d$  electrons of Zr atoms for FE ZrSI<sub>2</sub>.



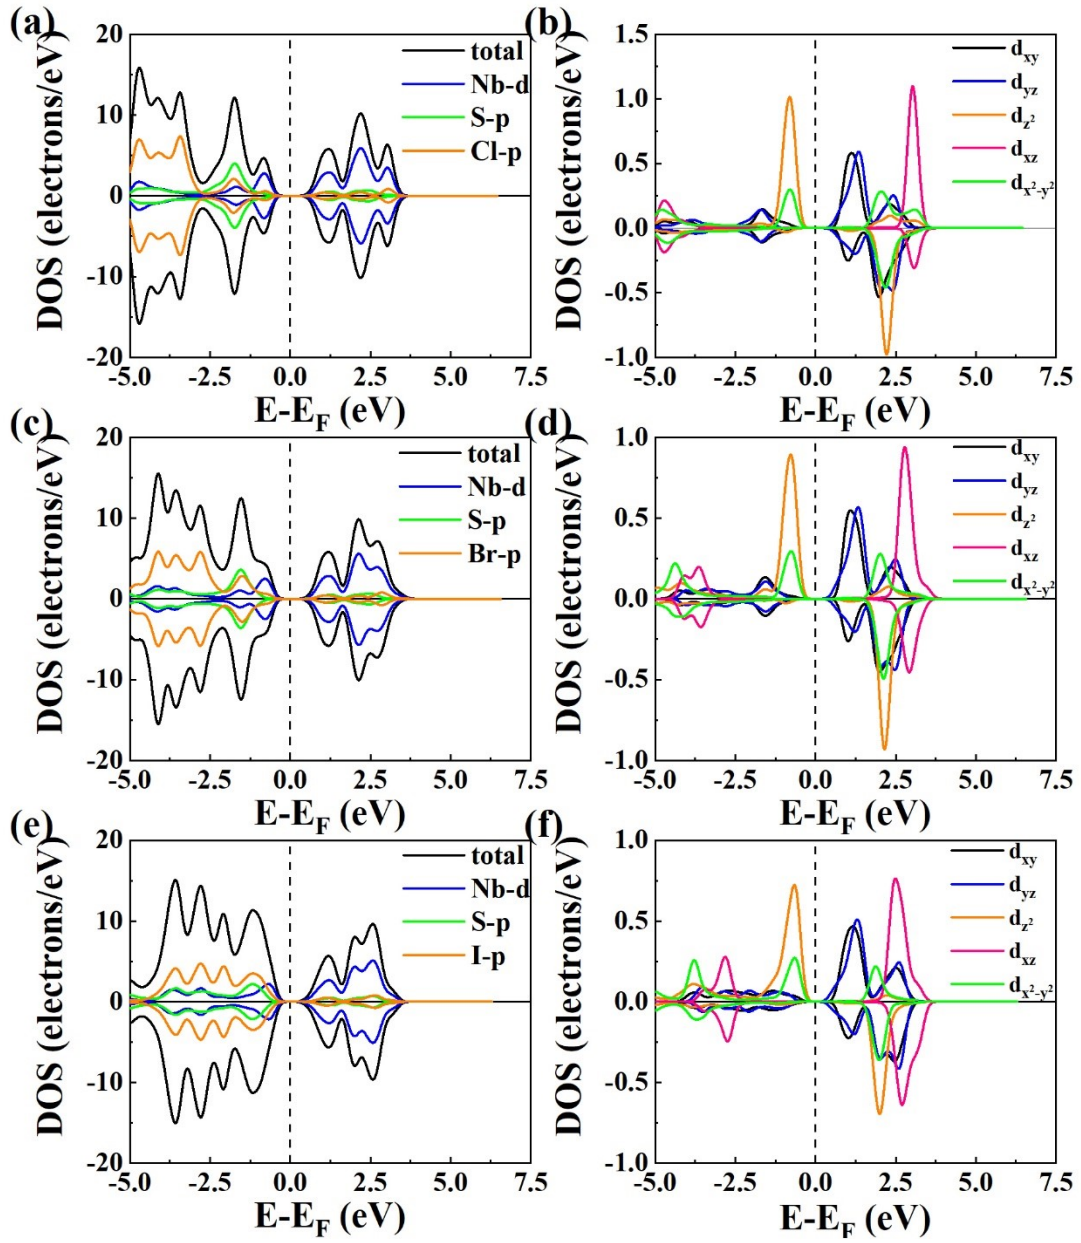

Figure S24 At  $U = 3$  eV, (a) PDOSs of ions and (b) PDOSs of the  $d$  electrons of Nb atoms for FE NbSCl<sub>2</sub>, (c) PDOSs of ions and (d) PDOSs of the  $d$  electrons of Nb atoms for FE NbSBr<sub>2</sub>, and (e) PDOSs of ions and (f) PDOSs of the  $d$  electrons of Nb atoms for FE NbSI<sub>2</sub>.

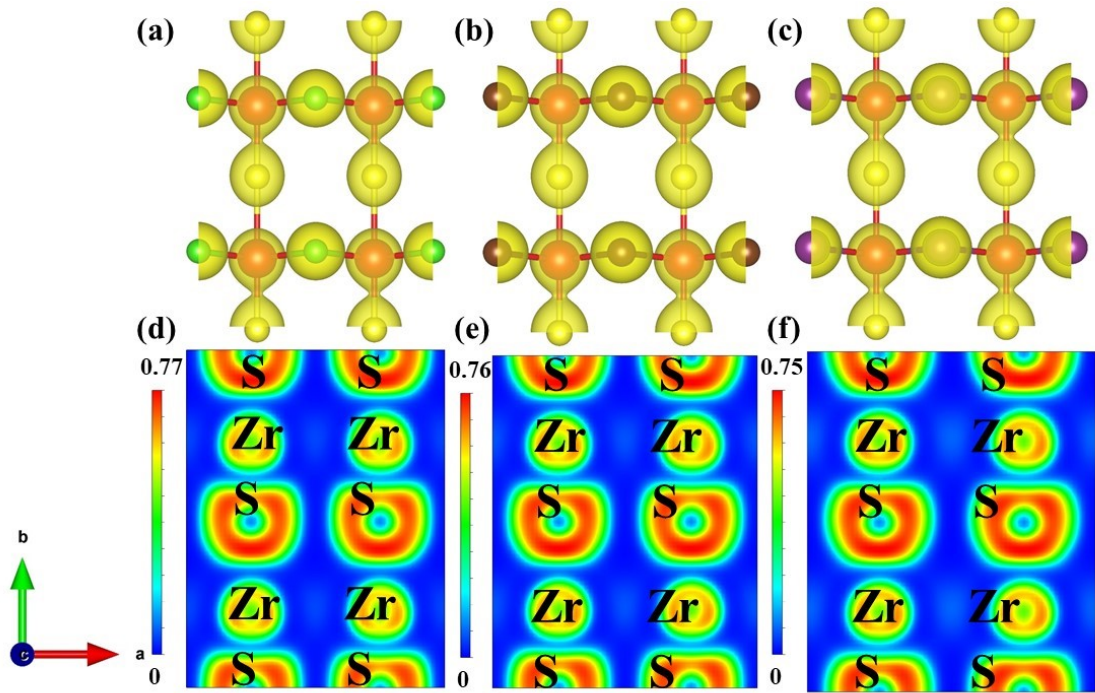

Figure S25 Top views of charge densities in FE (a)  $\text{ZrSCl}_2$ , (b)  $\text{ZrSBr}_2$ , and (c)  $\text{ZrSI}_2$  and ELFs of (d)  $\text{ZrSCl}_2$ , (e)  $\text{ZrSBr}_2$ , and (f)  $\text{ZrSI}_2$ .

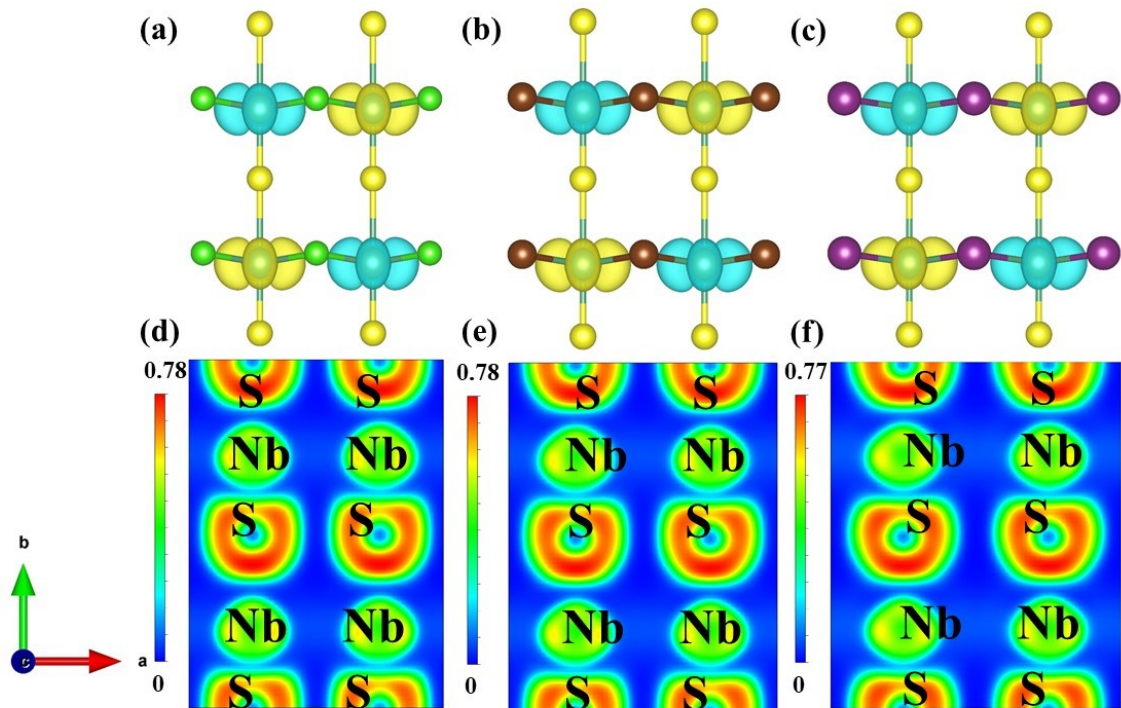

Figure S26 Top views of spin densities in FE (a)  $\text{NbSCl}_2$ , (b)  $\text{NbSBr}_2$ , and (c)  $\text{NbSI}_2$  and ELFs of (d)  $\text{NbSCl}_2$ , (e)  $\text{NbSBr}_2$ , and (f)  $\text{NbSI}_2$  with  $U = 3$  eV. The spin-up density is shown in yellow and the spin-down density is shown in blue, respectively.

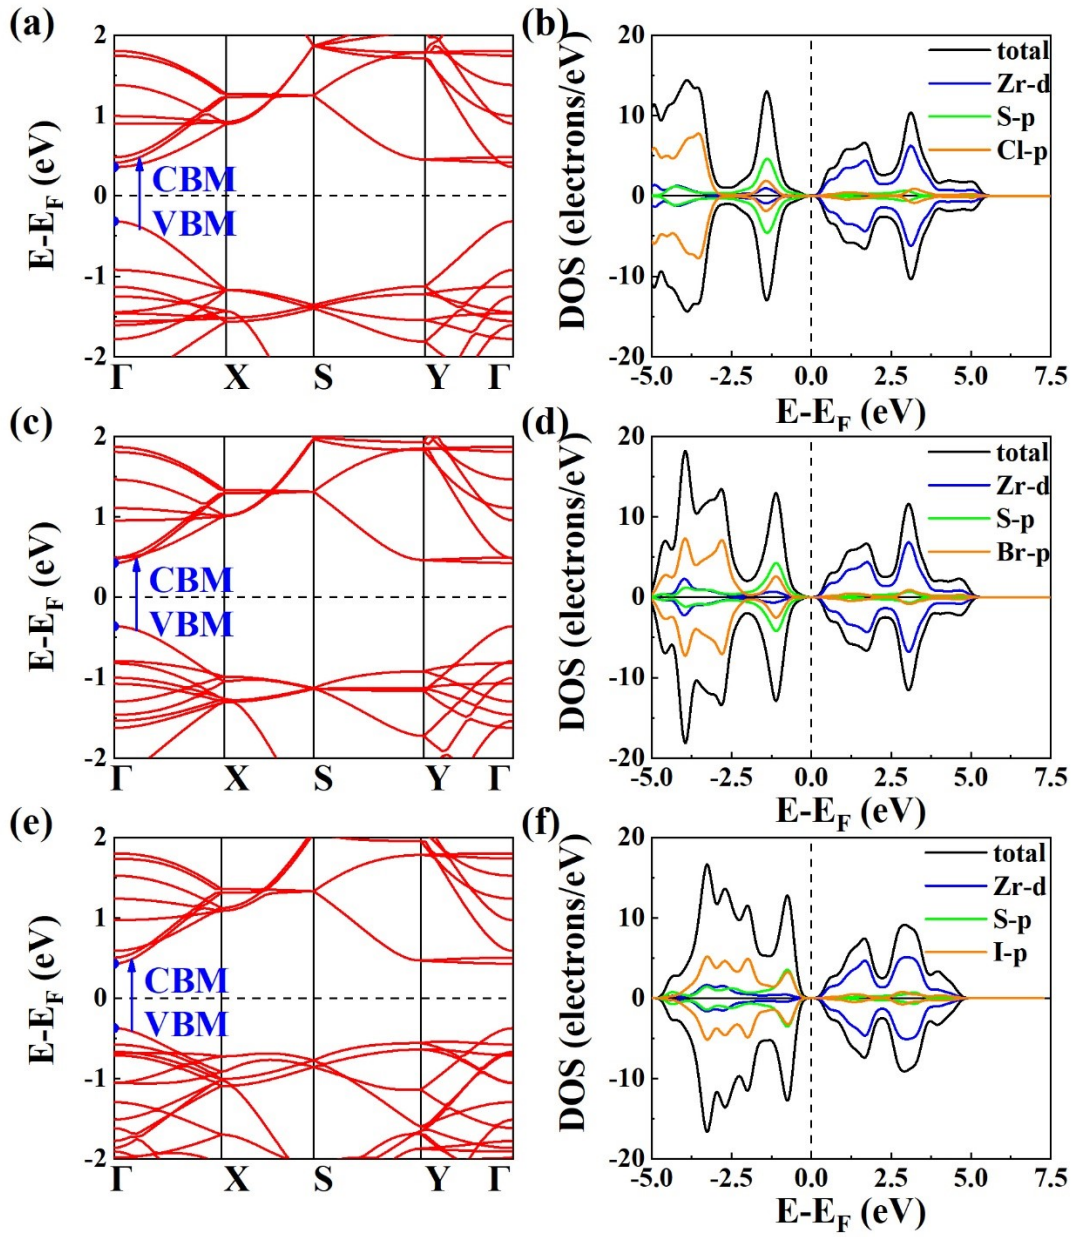

Figure S27 (a) Bands and (b) PDOSs of PE ZrSCl<sub>2</sub>, (c) bands and (d) PDOSs of PE ZrSBr<sub>2</sub>, and (e) bands and (f) PDOSs of PE ZrSI<sub>2</sub> without  $U$ .



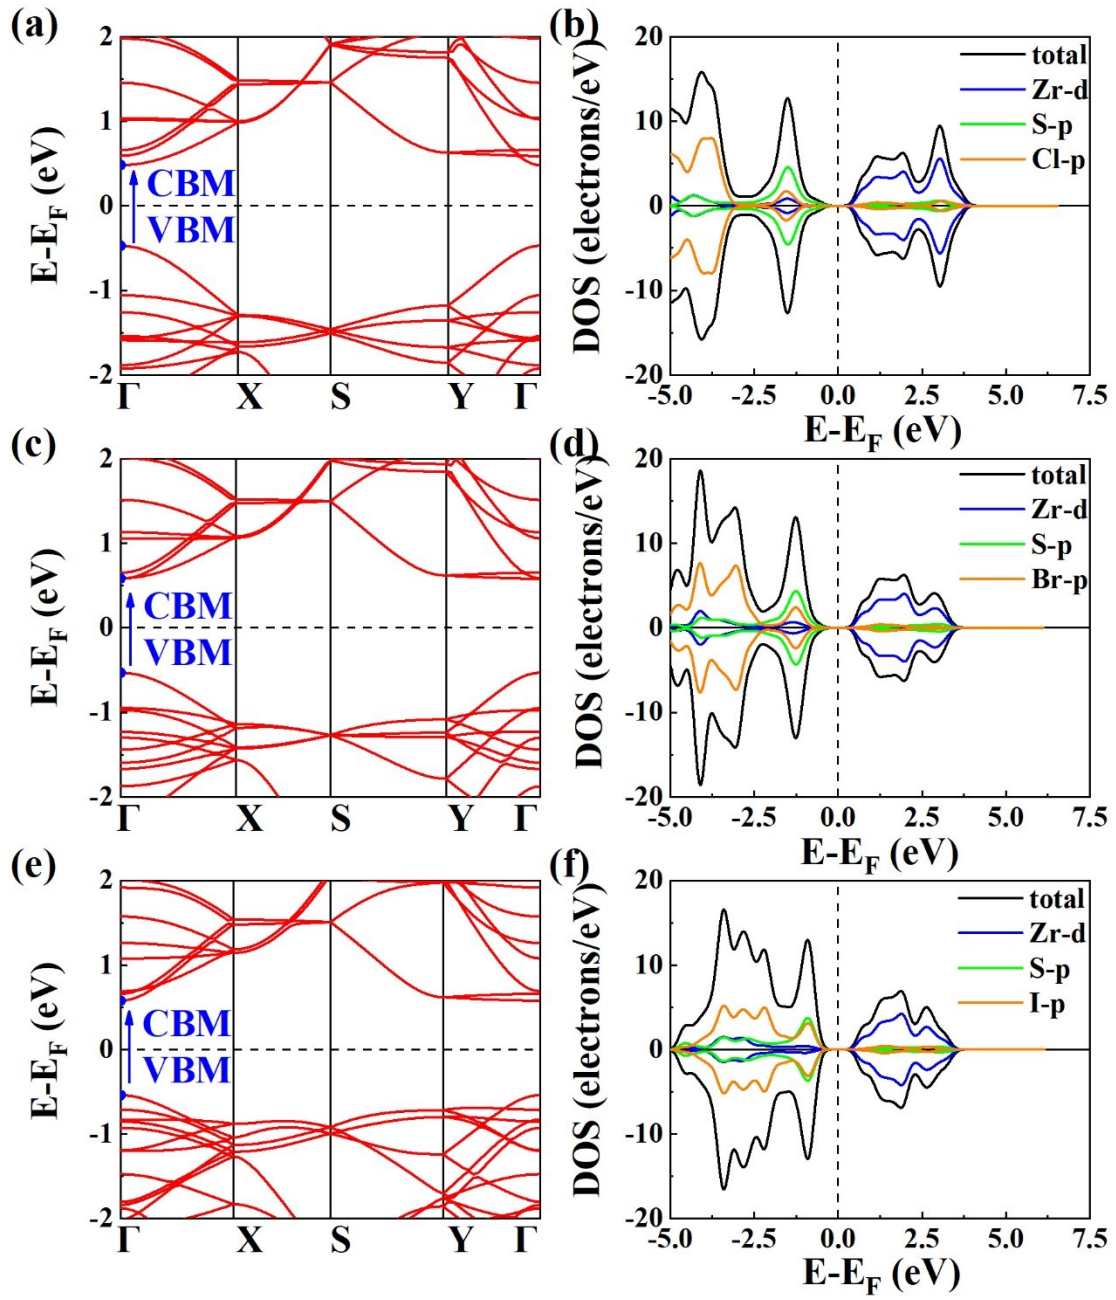

Figure S28 (a) Bands and (b) PDOSs of ZrSCl<sub>2</sub>, (c) bands and (d) PDOSs of ZrSBr<sub>2</sub>, and (e) bands and (f) PDOSs of ZrSI<sub>2</sub> with  $U = 3$  eV.

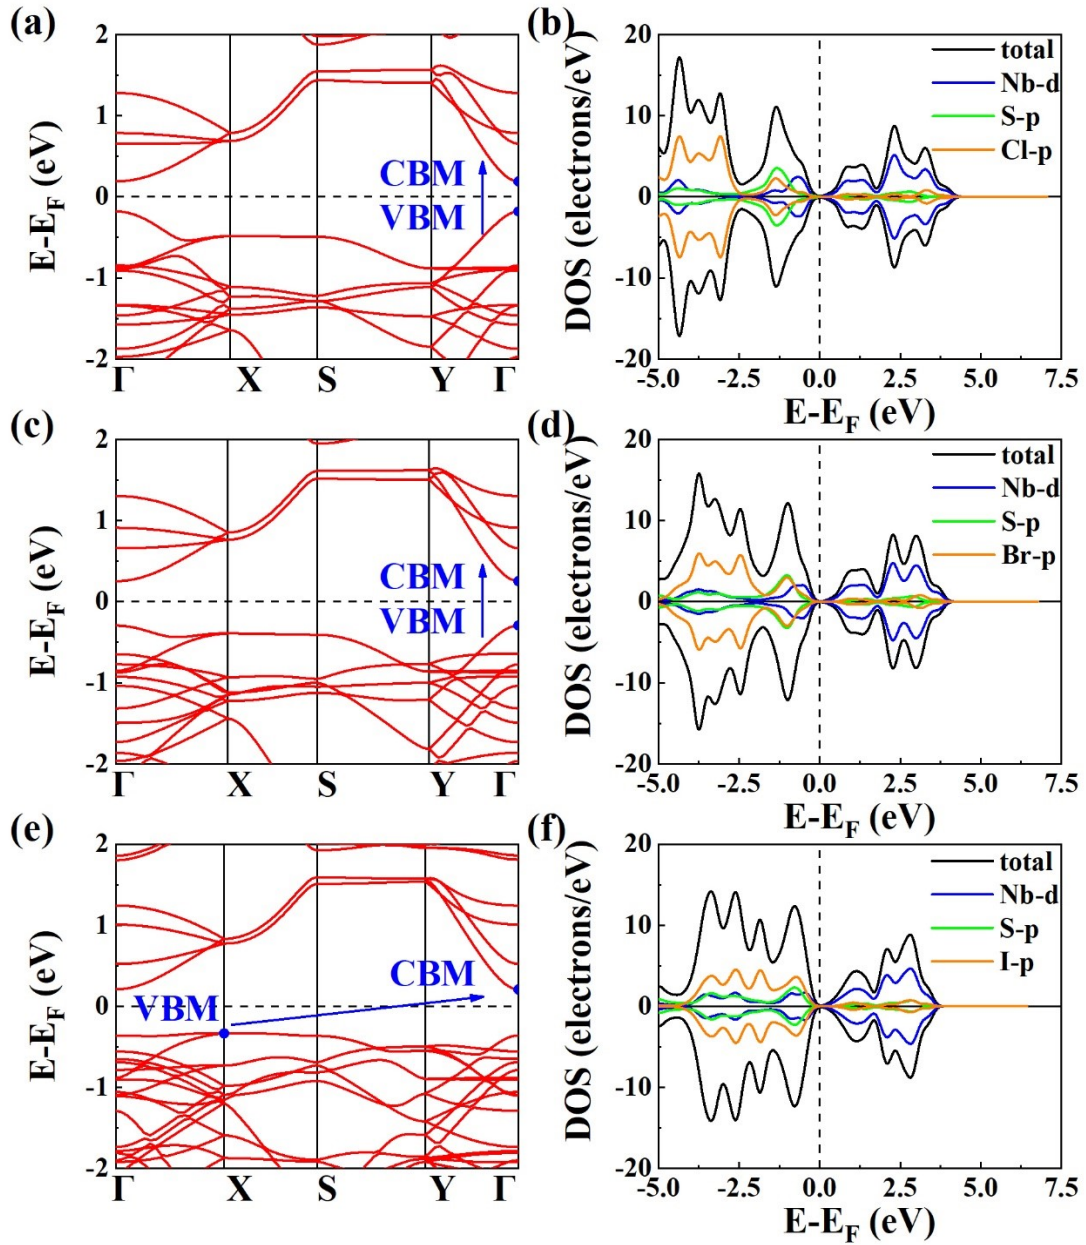

Figure S29 (a) Bands and (b) PDOSs of PE NbSCl<sub>2</sub>, (c) bands and (d) PDOSs of PE NbSBr<sub>2</sub>, and (e) bands and (f) PDOSs of PE NbSI<sub>2</sub> with  $U = 3$  eV.

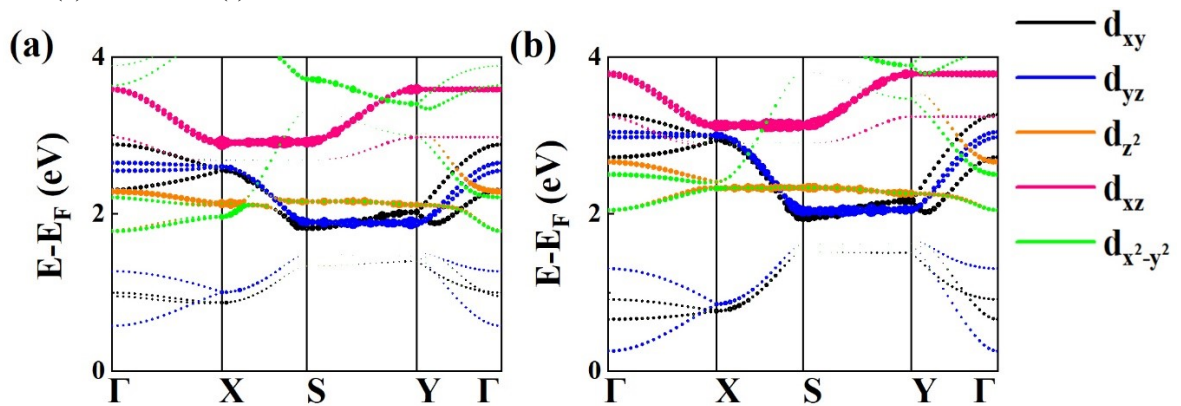

Figure S30 Projected bands of Nb atoms of (a) FE and (b) PE NbSBr<sub>2</sub> with  $U = 3$  eV.



Table S1 Lattice parameters, bond lengths, and bond angles of the proposed structures.

| MSX <sub>2</sub>   | $U$<br>(eV) | phase | a (Å) | b (Å) | M-S<br>(Å) | M-S<br>(Å) | M-X<br>(Å) | $\theta_1$ (°) | $\theta_2$ (°) |
|--------------------|-------------|-------|-------|-------|------------|------------|------------|----------------|----------------|
| ZrSCl <sub>2</sub> | 0           | FE    | 3.793 | 4.952 | 2.301      | 2.651      | 2.577      | 95.240         | 84.760         |
| ZrSCl <sub>2</sub> | 0           | PE    | 3.814 | 4.875 | 2.438      | 2.438      | 2.579      | 90             | 90             |
| ZrSCl <sub>2</sub> | 3           | PE    | 3.852 | 4.909 | 2.455      | 2.455      | 2.600      | 90             | 90             |
| ZrSBr <sub>2</sub> | 0           | FE    | 3.935 | 4.939 | 2.304      | 2.635      | 2.735      | 95.159         | 84.841         |
| ZrSBr <sub>2</sub> | 0           | PE    | 3.955 | 4.870 | 2.435      | 2.435      | 2.737      | 90             | 90             |
| ZrSBr <sub>2</sub> | 3           | PE    | 3.993 | 4.906 | 2.453      | 2.453      | 2.759      | 90             | 90             |
| ZrSI <sub>2</sub>  | 0           | FE    | 4.167 | 4.912 | 2.320      | 2.592      | 2.956      | 94.389         | 85.611         |
| ZrSI <sub>2</sub>  | 0           | PE    | 4.181 | 4.864 | 2.432      | 2.432      | 2.958      | 90             | 90             |
| ZrSI <sub>2</sub>  | 3           | PE    | 4.221 | 4.902 | 2.451      | 2.451      | 2.981      | 90             | 90             |
| NbSCl <sub>2</sub> | 0           | FE    | 3.336 | 4.919 | 2.187      | 2.733      | 2.491      | 97.615         | 82.385         |
| NbSCl <sub>2</sub> | 3           | FE    | 3.599 | 4.913 | 2.226      | 2.687      | 2.526      | 97.171         | 82.829         |
| NbSCl <sub>2</sub> | 3           | PE    | 3.643 | 4.775 | 2.388      | 2.388      | 2.532      | 90             | 90             |
| NbSBr <sub>2</sub> | 0           | FE    | 3.515 | 4.877 | 2.208      | 2.669      | 2.654      | 97.027         | 82.973         |
| NbSBr <sub>2</sub> | 3           | FE    | 3.766 | 4.886 | 2.23       | 2.655      | 2.683      | 96.822         | 83.178         |
| NbSBr <sub>2</sub> | 3           | PE    | 3.801 | 4.766 | 2.383      | 2.383      | 2.689      | 90             | 90             |
| NbSI <sub>2</sub>  | 0           | FE    | 3.799 | 4.766 | 2.226      | 2.540      | 2.852      | 95.574         | 84.426         |
| NbSI <sub>2</sub>  | 3           | FE    | 4.048 | 4.842 | 2.241      | 2.601      | 2.895      | 96.053         | 82.947         |
| NbSI <sub>2</sub>  | 3           | PE    | 4.076 | 4.753 | 2.376      | 2.376      | 2.902      | 90             | 90             |

Table S2 Polar displacements of structures (Å) with different  $U$ .

| MSX <sub>2</sub>   | $U = 0$ | $U = 1$ eV | $U = 2$ eV | $U = 3$ eV |
|--------------------|---------|------------|------------|------------|
| ZrSCl <sub>2</sub> | 0.175   | 0.132      | 0.071      | 0          |
| ZrSBr <sub>2</sub> | 0.165   | 0.122      | 0.057      | 0          |
| ZrSI <sub>2</sub>  | 0.136   | 0.089      | 0.004      | 0          |
| NbSCl <sub>2</sub> | 0.273   | 0.239      | 0.215      | 0.157      |
| NbSBr <sub>2</sub> | 0.231   | 0.345      | 0.334      | 0.319      |
| NbSI <sub>2</sub>  | 0.157   | 0.203      | 0.193      | 0.172      |

Table S3 Formation energies of structures.

| MSX <sub>2</sub>   | Tension (%) | $U$ (eV) | $E_f$<br>(eV/unitcell) |
|--------------------|-------------|----------|------------------------|
| ZrSCl <sub>2</sub> | 0           | 0        | -1.835                 |
| ZrSCl <sub>2</sub> | 5           | 0        | -1.822                 |
| ZrSCl <sub>2</sub> | 0           | 3        | -1.410                 |
| ZrSBr <sub>2</sub> | 0           | 0        | -1.530                 |
| ZrSBr <sub>2</sub> | 5           | 0        | -1.516                 |
| ZrSBr <sub>2</sub> | 0           | 3        | -1.101                 |
| ZrSI <sub>2</sub>  | 0           | 0        | -1.208                 |
| ZrSI <sub>2</sub>  | 5           | 0        | -1.192                 |
| ZrSI <sub>2</sub>  | 0           | 3        | -0.775                 |
| NbSCl <sub>2</sub> | 0           | 3        | -0.745                 |
| NbSCl <sub>2</sub> | 5           | 3        | -0.684                 |
| NbSBr <sub>2</sub> | 0           | 3        | -0.457                 |
| NbSBr <sub>2</sub> | 5           | 3        | -0.437                 |
| NbSI <sub>2</sub>  | 0           | 3        | -0.165                 |
| NbSI <sub>2</sub>  | 5           | 3        | -0.147                 |

Table S4 Formation energies of other potential phases.

| MSX <sub>2</sub>   | $U$ (eV) | $E_{f1}$ (eV) | $E_{f2}$ (eV) |
|--------------------|----------|---------------|---------------|
| ZrSCl <sub>2</sub> | 0        | -1.970        | -0.431        |
| ZrSCl <sub>2</sub> | 3        | -2.330        | -0.731        |
| ZrSBr <sub>2</sub> | 0        | -0.869        | -0.451        |
| ZrSBr <sub>2</sub> | 3        | -1.217        | -0.710        |
| ZrSI <sub>2</sub>  | 0        | 0.320         | -0.534        |
| ZrSI <sub>2</sub>  | 3        | -0.012        | -0.792        |
| NbSCl <sub>2</sub> | 3        | -1.664        | -0.768        |
| NbSBr <sub>2</sub> | 3        | -0.635        | -0.923        |
| NbSI <sub>2</sub>  | 3        | 0.435         | -1.091        |

Table S5 Energies (eV) and lattice parameters (Å) of ZrSX<sub>2</sub> with and without spin.

| ZrSX <sub>2</sub>  | Including spin | $U$ (eV) | Energy (eV) | a (Å) | b (Å) |
|--------------------|----------------|----------|-------------|-------|-------|
| ZrSCl <sub>2</sub> | yes            | 0        | -22.472     | 3.793 | 4.952 |
| ZrSCl <sub>2</sub> | no             | 0        | -22.472     | 3.793 | 4.952 |
| ZrSBr <sub>2</sub> | yes            | 0        | -21.128     | 3.935 | 4.939 |
| ZrSBr <sub>2</sub> | no             | 0        | -21.128     | 3.935 | 4.939 |
| ZrSI <sub>2</sub>  | yes            | 0        | -19.741     | 4.167 | 4.912 |
| ZrSI <sub>2</sub>  | no             | 0        | -19.741     | 4.167 | 4.912 |

Table S6 Energies (eV) of AFM states of NbSX<sub>2</sub>.

| NbSX <sub>2</sub>  | FM      | AFM1    | AFM2    | AFM3           |
|--------------------|---------|---------|---------|----------------|
| NbSCL <sub>2</sub> | -78.310 | -79.211 | -78.285 | <b>-79.214</b> |
| NbSBr <sub>2</sub> | -73.979 | -74.119 | -73.968 | <b>-74.123</b> |
| NbSI <sub>2</sub>  | -68.980 | -69.043 | -68.961 | <b>-69.049</b> |

Table S7 Bandgaps of the proposed structures.

| MSX <sub>2</sub>   | phase | method                          | Band gap (eV) |
|--------------------|-------|---------------------------------|---------------|
| ZrSCL <sub>2</sub> | FE    | DFT                             | 1.022         |
| ZrSCL <sub>2</sub> | PE    | DFT                             | 0.674         |
| ZrSCL <sub>2</sub> | PE    | DFT+ <i>U</i> , <i>U</i> = 3 eV | 0.954         |
| ZrSCL <sub>2</sub> | FE    | HSE06                           | 1.963         |
| ZrSBr <sub>2</sub> | FE    | DFT                             | 1.059         |
| ZrSBr <sub>2</sub> | PE    | DFT                             | 0.787         |
| ZrSBr <sub>2</sub> | PE    | DFT+ <i>U</i> , <i>U</i> = 3 eV | 1.112         |
| ZrSBr <sub>2</sub> | FE    | HSE06                           | 1.984         |
| ZrSI <sub>2</sub>  | FE    | DFT                             | 1.015         |
| ZrSI <sub>2</sub>  | PE    | DFT                             | 0.803         |
| ZrSI <sub>2</sub>  | PE    | DFT+ <i>U</i> , <i>U</i> = 3 eV | 1.118         |
| ZrSI <sub>2</sub>  | FE    | HSE06                           | 1.873         |
| NbSCL <sub>2</sub> | FE    | DFT+ <i>U</i> , <i>U</i> = 3 eV | 1.287         |
| NbSCL <sub>2</sub> | PE    | DFT+ <i>U</i> , <i>U</i> = 3 eV | 0.369         |
| NbSBr <sub>2</sub> | FE    | DFT+ <i>U</i> , <i>U</i> = 3 eV | 1.204         |
| NbSBr <sub>2</sub> | PE    | DFT+ <i>U</i> , <i>U</i> = 3 eV | 0.547         |
| NbSI <sub>2</sub>  | FE    | DFT+ <i>U</i> , <i>U</i> = 3 eV | 1.006         |
| NbSI <sub>2</sub>  | PE    | DFT+ <i>U</i> , <i>U</i> = 3 eV | 0.538         |

Table S8 Bond angles of proposed structures with and without tension (°).

| MSX <sub>2</sub>   | <i>U</i> (eV) | Tension (%) | $\theta_1$ | $\theta_2$ | $\alpha_1$ | $\alpha_2$ | $(\alpha_1 + \alpha_2)/2$ |
|--------------------|---------------|-------------|------------|------------|------------|------------|---------------------------|
| ZrSCL <sub>2</sub> | 0             | 0           | 95.240     | 84.760     | 94.765     | 84.276     | 89.521                    |
| ZrSCL <sub>2</sub> | 0             | 5           | 98.085     | 81.915     | 94.790     | 82.932     | 88.861                    |
| ZrSBr <sub>2</sub> | 0             | 0           | 95.159     | 84.841     | 92.007     | 87.067     | 89.537                    |
| ZrSBr <sub>2</sub> | 0             | 5           | 98.133     | 81.867     | 92.113     | 85.590     | 88.852                    |
| ZrSI <sub>2</sub>  | 0             | 0           | 94.389     | 85.611     | 89.629     | 89.701     | 89.665                    |
| ZrSI <sub>2</sub>  | 0             | 5           | 97.719     | 82.281     | 89.805     | 88.127     | 88.966                    |
| NbSBr <sub>2</sub> | 3             | 0           | 96.822     | 83.178     | 89.156     | 89.227     | 89.192                    |
| NbSBr <sub>2</sub> | 3             | 5           | 98.909     | 81.091     | 93.421     | 83.820     | 88.621                    |
| NbSI <sub>2</sub>  | 3             | 0           | 96.053     | 82.947     | 88.726     | 90.000     | 89.363                    |
| NbSI <sub>2</sub>  | 3             | 5           | 98.308     | 81.692     | 92.200     | 85.403     | 88.802                    |
